# Supplementary material for: Synaptic vesicle traffic is supported by transient actin filaments and regulated by PKA and NO
Source: Springer Nature journal article supplement (doi:10.1038/s41467-020-19120-1), 2020-10-21
Supplement: 41467_2020_19120_MOESM1_ESM.pdf [file 41467_2020_19120_MOESM1_ESM.pdf]

# 1 Synaptic vesicle traffic is supported by 2 transient actin filaments and regulated 3 by PKA and NO

## 4 **Authors**

5 Nicolas Chenouard<sup>1,2</sup>, Feng Xuan<sup>1,3</sup>, Richard W. Tsien<sup>1,4</sup>

## 6 **Affiliations**

7 1. NYU Neuroscience Institute and Department of Neuroscience and Physiology, NYU Langone  
8 Medical Center, New York, NY 10016, USA.

9 2. Univ. Bordeaux, CNRS, Interdisciplinary Institute for Neuroscience, IINS, UMR 5297, F-  
10 33000 Bordeaux, France.

11 3. Current address: Interdepartmental Neuroscience Program, Northwestern University,  
12 Evanston, IL 60208, USA.

13 4. Center for Neural Science, New York University, New York, NY 10003, USA.

## 14 **Corresponding author**

15 R.W.T: Richard.Tsien@nyulangone.org

## 16 **Supplementary Methods: image analysis**

### 17 **Extraction of the kymograph representation**

18 In order to analyze spatio-temporal fluorescence variations along axons we used the method of  
19 kymograph (or kymogram) which consists in tracing the spatial location of an axon as a curved  
20 2D line, and then extracting fluorescence through time along this line to obtain a 2D spatio-  
21 temporal representation of fluorescence. One dimension (vertical) is the locus along the axon,  
22 and time is the second one (horizontal). We used the plugin software ‘KymographTracker’  
23 (plugin ID: ICY-K4O2C2) [1] for the ICY image analysis platform [2]. Briefly, for axon tracing we  
24 clicked on each axon extremities in a temporal projection of the image stack and the rest of the  
25 axon path was automatically traced by the software based on the local fluorescence intensity

26 using a Dijkstra's (shortest path) algorithm and then smoothed based on a standard smoothing  
27 spline technique. At last, in each frame of the image sequence, fluorescence was extracted  
28 along the smooth 2D axonal path with a sampling step of 1 pixel to preserve the spatial scale.  
29 To enhance F-actin signals in Utr-CH:GFP kymographs,  $\Delta F_{\text{Utr-CH:GFP}}$  measures were obtained by  
30 computing the differences between the raw Utr-CH:GFP fluorescence values and the pointwise  
31 averaged signals from -6 s to -1 s prior. We then applied a de-noising technique that smoothed  
32 images but preserved edge-like features [3].

### 33 **Fluorescence auto-correlation analysis**

34 For each image sequence, after kymograph extraction, we concatenated kymographs spatially  
35 as if axonal branches from the same field of view were a single structure and computed the  
36 Pearson linear correlation  $\rho$  between each pair of columns (time points) of the combined  
37 kymograph. The autocorrelation function value at time interval  $\Delta t$  was computed as the median  
38 autocorrelation value of pairs of kymograph columns that are  $\Delta t$  apart

$$r(\Delta t) = \text{median}_{K:\text{kymographs}} \rho(K(t), K(t + \Delta t))$$

39 The autocorrelation function  $r(\Delta t)$  was fitted with a mono-exponential function  $ae^{-\tau\Delta t} + b$ ,  
40 where  $\tau$  was the decay rate ( $\text{s}^{-1}$ ).  $\tau$  characterized the overall fluorescence motility along the  
41 axonal branches: the larger, the less stable. In practice, the autocorrelation values are under-  
42 estimated because images are contaminated with a random (white) noise. In particular,  
43  $r(\Delta t \rightarrow 0) = k^2/(\sigma^2 + k^2) < 1$ , where  $k^2$  is the variance of the noiseless fluorescence signal  
44 and  $\sigma^2$  is the variance of the noise. Importantly, white noise with constant power does not affect  
45  $\tau$ . Therefore, for display purpose only, we normalized autocorrelation functions  $\hat{r}(\Delta t) =$   
46  $r(\Delta t)/r(\Delta t \rightarrow 0)$  so that image sequences with different noise levels are easier to visually  
47 compare.  $\sigma^2$  was automatically estimated using the median absolute deviation measure and  $k^2$   
48 was computed as the average variance along kymograph columns minus  $\sigma^2$ .

### 49 **Quantification of SV cluster dynamics**

50 Starting from kymographs of fluorescence along axonal branches we traced high velocity events  
51 appearing as diagonal lines using ICY. As shown in Supplementary Fig. 4A, the width of  
52 segments corresponded to the duration of the event, height indicated distance traveled, and the  
53 slope was proportional to the speed. On top of extracting these three features characterizing  
54 individual trafficking events, we computed two global measures: the axonal *mobility* and *active*  
55 *transport (AT) rate*. For FM dyes and VAMP2:mCherry images they were computed as follows:

$$\text{Mobility (s}^{-1}\text{)} = \frac{\text{Cumulated distance travelled by AT}}{\text{Total duration of observation} \times \text{length of monitored axonal segments}}$$

$$\text{AT rate (}\mu\text{m}^{-1}\text{s}^{-1}\text{)} = \frac{\text{Total number of AT events}}{\text{Total duration of observation} \times \text{length of monitored axonal segments}}$$

56 where normalization was useful to compare image sequences with varying number of axonal  
 57 branches and of density of synapses and vesicles. In contrast with FM dyes and  
 58 VAMP2:mCherry, the QD-based staining is quantal so that it is appropriate to normalize  
 59 measures by the staining rate (ie number of QDs). Because fluorescent traces are crisp, we  
 60 were able to exhaustively trace paths for SV-QD clusters (Fig. S3A) and we computed the  
 61 modified measures:

$$\text{Mobility (}\mu\text{ms}^{-1}\text{)} = \frac{\text{Cumulated distance travelled by AT}}{\text{Total duration of observation} \times \text{number of QD clusters}}$$

$$\text{AT rate (s}^{-1}\text{)} = \frac{\text{Total number of AT events}}{\text{Total duration of observation} \times \text{number of QD clusters}}$$

62 which account for the number of loaded QDs loaded in SVs and allowed us to fairly compare  
 63 different field of views and coverslips with varying density of axons and synapses. AT segments  
 64 where considered to be the ones with velocity  $>100 \text{ nm s}^{-1}$ , in agreement with the single vesicle  
 65 characterization of SV transport (Fig. 4).

### 66 **Quantification of longitudinal actin polymerization**

67 Actin polymerization was quantified in a similar fashion as for the analysis of FM 1-43 and  
 68 VAMP2:mCherry puncta dynamics: kymographs were extracted based on the average Utr-  
 69 CH:GFP fluorescence and polymerizing filaments were identified as diagonal lines  
 70 (Supplementary Fig. 4B). Normalized measures of filament polymerization were computed as

$$\begin{aligned} \text{Actin polymerization (s}^{-1}\text{)} \\ = \frac{\text{Cumulated length of new actin filament polymerization}}{\text{Total duration of observation} \times \text{length of monitored axonal segments}} \end{aligned}$$

$$\begin{aligned} \text{Filament count (}\mu\text{m}^{-1}\text{s}^{-1}\text{)} \\ = \frac{\text{Number of new actin filaments}}{\text{Total duration of observation} \times \text{length of monitored axonal segments}} \end{aligned}$$

## 71 Single SV tracking and motion characterization

72 We first automatically detected the location of SV-QD using ICY (plugin ID ICY-R3M2Y2) [4]  
73 and refined the spatial localization by fitting a Gaussian approximation of the particle shape to  
74 the images (custom Matlab script). In order to quantify the localization accuracy, we adsorbed  
75 diluted QDs on a glass coverslip, applied the experimental imaging solution at 37C, and imaged  
76 immobilized QDs when using the same acquisition protocol as for trafficking experiments.  
77 Isolated QDs were then detected as above. Assuming detection errors are random and  
78 unbiased, the mean detected location over hundreds of frames should be an excellent  
79 approximation of the true location of the center of the immobile QD. For each frame we  
80 therefore computed the deviation from this pseudo-true location and estimated the localization  
81 error to be 30.2 nm on average (excluding frames in which QDs blinked off).

82 Trajectories of QDs were automatically built upon the detected positions using a computational  
83 technique that copes for blink off events and discards spurious detections (ICY plugin ICY-  
84 L5S9M5) [5]. We then systematically examined images to remove the few spurious trajectories  
85 which arose by chance from pixel noise. In each spatiotemporal trajectory, time points of AT  
86 initiation and termination were automatically detected using the trajectory analysis method  
87 described in [6]. Briefly, based on the vectors of Cartesian coordinates for each trajectory  
88  $[x(t)]_{t=0\dots T-1}$  and  $[y(t)]_{t=0\dots T-1}$ , we computed the 2D instantaneous displacements function:  
89  $d(t) = [x(t+1) - x(t), y(t+1) - y(t)]$  and a mathematical optimization method was used to  
90 approximate it by a 2D piecewise-constant function of time  $v(t) = [v_x(t), v_y(t)]$  which  
91 corresponds to periods of constant velocity ( $v(t) = v(t+1)$  for most  $t$ ) and, doing so, cancels  
92 out fluctuations arising from random diffusion and localization inaccuracy. We then detected  
93 each period of constant velocity and tested them against a null model of random diffusion. Our  
94 model of AT is a sequence of steps with coherent direction and velocity, while random diffusion  
95 is a non-order set of displacements with arbitrary directions. In order to simulate diffusion with  
96 characteristics similar to the observed trajectory, we therefore repeatedly permuted observed  
97 displacements in a random order and changed their sign. We then compared the observed  
98 length of the cumulated displacement to the distribution of the simulated displacement lengths in  
99 order to compute the  $p$ -value of the putative AT period for the null model of diffusion. Only AT  
100 periods with  $p < 0.05$  were kept as non-diffusive.

101 In order to characterize the diffusive dynamics of SVs outside of AT events, we used the  
102 standard tool of mean squared displacements (MSDs). For a given time lag  $\Delta t$  and time  
103 segments devoid of AT (we split those containing AT in multiple parts), it consisted in first



104 computing the MSD length between all pairs of positions that are  $\Delta t$  apart in time

$$MSD(\Delta t)(\mu m^2) = \frac{1}{N} \sum_{t=0}^{T-\Delta t} (x(t + \Delta t) - x(t))^2 + (y(t + \Delta t) - y(t))^2$$

105 with  $N$  the number of position pairs  $\Delta t$  apart in time. The shape of the MSD function was then  
106 analyzed as it characterized the mode of particle diffusion. For large  $\Delta t$  values it can be shown  
107 that the following model of MSD  $MSD(\Delta t) \propto (\Delta t)^\alpha$  or equivalently  $\log MSD(\Delta t) \approx \alpha \log \Delta t +$   
108 *constant term* is accurate for a variety of modes of diffusion [7].  $\alpha$  is a discriminant parameter  
109 characterizing diffusing type:  $\alpha=1$  for free normal diffusion,  $\alpha>1$  for super-diffusion ( $\alpha=2$  for  
110 directed motion such as AT),  $\alpha<1$  for anomalous sub-diffusive motion such as hindered,  
111 corralled or tethered diffusion [7]. We therefore computed the  $\alpha$  value for each trajectory as the  
112 slope of a straight line fitted to the MSD log-log curve for  $\Delta t > 1$  s.

### 113 **Syt1 cluster shape estimation**

114 Fluorescent Syt1-IgG puncta were automatically detected in microscopy images and their center  
115 of mass  $(x_0, y_0)$  was identified with sub-pixel accuracy. We then fitted a two-dimensional  
116 Gaussian function

$$g(x, y) = A e^{-\frac{(x \cos \theta - y \sin \theta - x_0)^2}{2L^2}} e^{-\frac{(x \sin \theta + y \cos \theta - x_0)^2}{2S^2}} + B$$

117 to the observed pixel intensity values around  $(x_0, y_0)$ . Here,  $\theta$  is a rotation angle with respect to  
118 the usual pixel Cartesian coordinates,  $L$  measures the longest puncta axis, and  $S$  is the shortest  
119 one.

**Supplementary Table 1: Pharmacological compounds**

| Name                    | Provider                                  | Catalog No. | Storage condition              | Storage temperature |
|-------------------------|-------------------------------------------|-------------|--------------------------------|---------------------|
| 1,9-Dideoxyforskolin    | Tocris Bioscience<br>Bristol, UK          | 5034        | 5 mM in DMSO                   | -20C                |
| 8-Bromo-cGMP            | Santa Cruz<br>Biotechnology<br>Dallas, TX | 200316      | 50 mM in H <sub>2</sub> O      | -20C                |
| BHQ-3 amine             | Biosearch<br>Technologies<br>Petaluma, CA | BHQ-3001-5  | 10 mM in DMSO                  | -20C                |
| Colchicine              | Sigma-Aldrich<br>St Louis, MO             | C9754       | Desiccated                     | Room temperature    |
| Cytochalasin D          | Sigma-Aldrich<br>St Louis, MO             | 22144-77-0  | 25 µg ml <sup>-1</sup> in DMSO | -20C                |
| DEA-NONOate             | Cayman Chemical<br>Ann Arbor, MI          | 372965-00-9 | 10 mM in degassed NaOH         | -80C                |
| Jasplakinolide          | Tocris bioscience                         | 2792        | 10 mM                          | -20C                |
| Latrunculin A           | Tocris bioscience                         | 76343-93-6  | 100 µM in DMSO                 | -20C                |
| ML 7                    | Tocris bioscience                         | 4310        | 100 µM in DMSO                 | -20C                |
| Nocodazole              | Sigma-Aldrich                             | M1404       | 10 mM in DMSO                  | -20C                |
| Okadaic Acid            | Tocris Bioscience                         | 78111-17-8  | 10 mM in DMSO                  | -20C                |
| Y-27632 dihydrochloride | Tocris Bioscience                         | 1254        | 10 mM in PBS                   | -20C                |

122 **Supplementary Figures**

Supplementary Figure 1

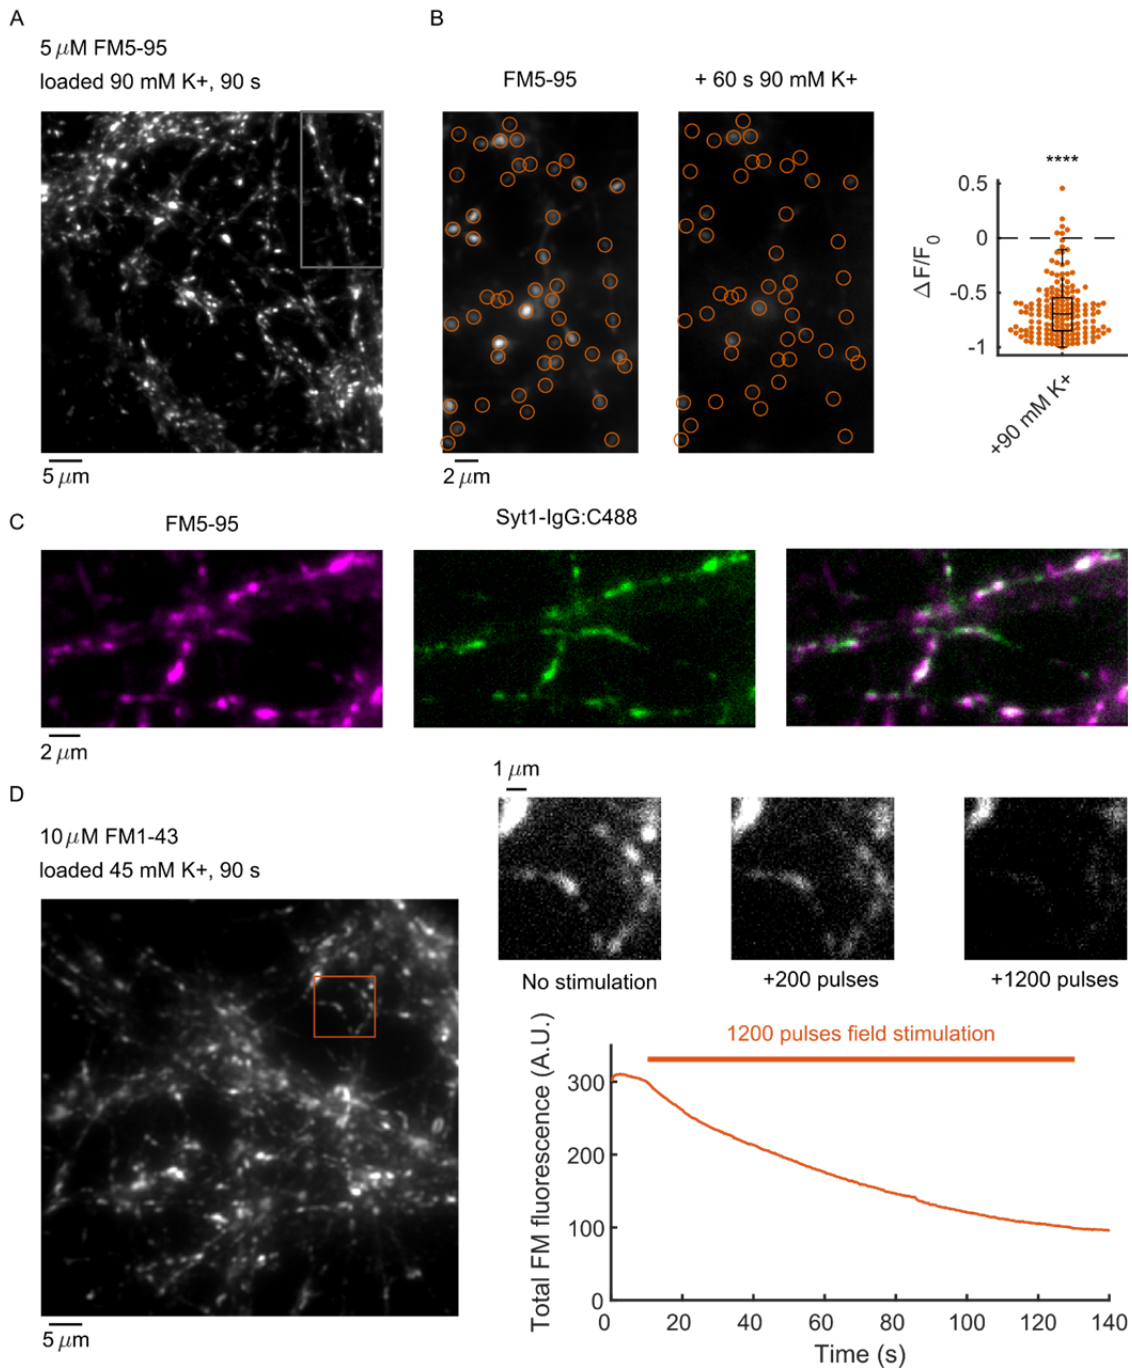

123

124

125

126 **Supplementary Figure 1. FM dye molecules stained recycling SVs and were exocytosed**  
127 **upon both electrical and high K<sup>+</sup> stimulations**

128 A, C: When using a loading protocol based on high potassium stimulation, FM dye assumed a  
129 punctate distribution in cells and matched that of a fluorescent antibody against the luminal  
130 domain of synaptotagmin 1, which was preloaded in synaptic vesicles (SVs), as expected from  
131 previous electron microscopy studies for specific SV targeting with FM dyes [8-11] and other  
132 vesicular probes [12]. C is a zoomed-in view of the gray box in A. B: A second high-potassium  
133 pulse triggered the exocytosis of FM dye molecules, attesting to the fusion-competence of SVs.  
134 Fluorescence in regions of interest automatically detected with ICY (red circles) strongly  
135 decreased after 90 s exposure to 90 mM K<sup>+</sup> (median change -69.5%,  $p < 10^{-6}$ , one-sided sign  
136 (S) test,  $N=164$  puncta from A). D: A 10 Hz train of electrical stimuli caused massive FM dye  
137 exocytosis. The onset of the dye loss matched the start of the stimulus train (red bar), hence  
138 confirming the electrically-triggered release of SVs.

139

Supplementary Figure 2

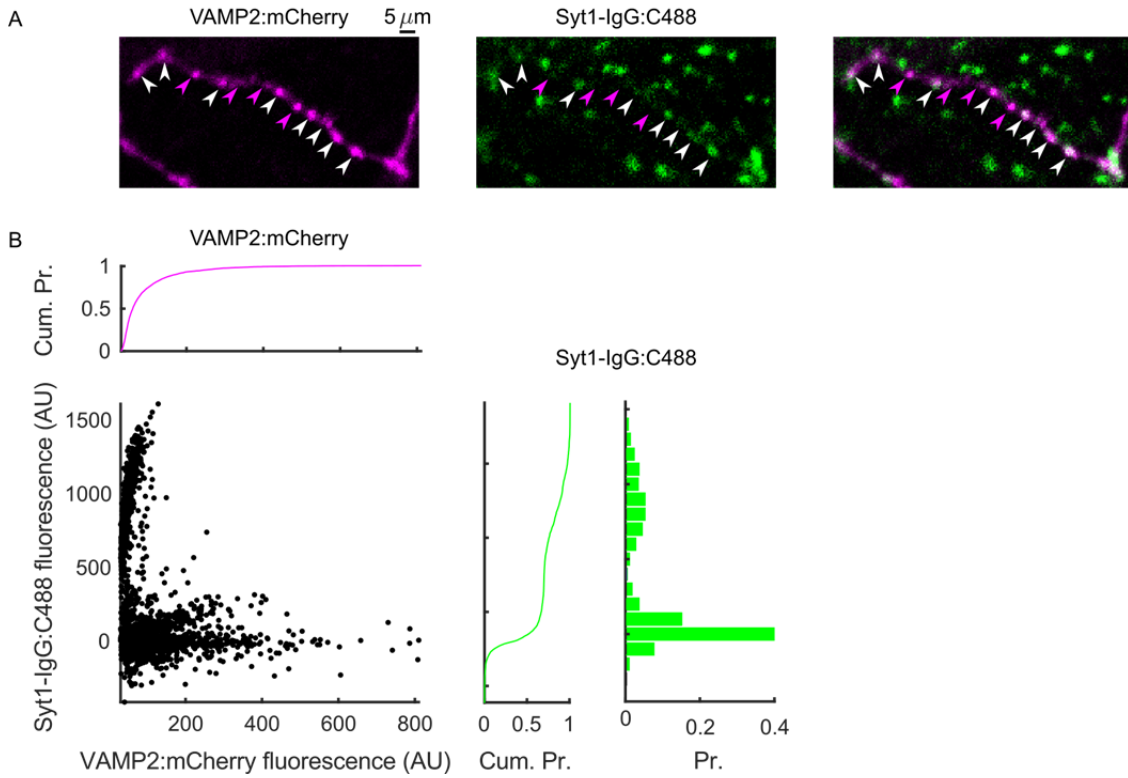

140

141 **Supplementary Figure 2. Co-immunolabeling of VAMP2 and luminal synaptotagmin 1**

142 A: Live staining of SVs with a fluorescent antibody against the luminal domain of synaptotagmin  
143 1 (Syt1-IgG:C488) by spontaneous recycling (2-4 h) showed sites of colocalization with VAMP2-  
144 mCherry expression (white arrows) but also VAMP2-mCherry-positive puncta devoid of staining  
145 for recycling SVs (magenta). B: analysis of VAMP2:mCherry and Syt1-IgG:C488 fluorescence at  
146 detected IgG puncta showed two groups of puncta: high Syt1-IgG but low VAMP2:mCherry  
147 fluorescence (vertical cloud of points) and high VAMP2:mCherry but moderate Syt1-IgG:C488  
148 fluorescence (right-leaning cloud).  $N=3274$  puncta from 8 independent coverslips.

149

Supplementary Figure 3

A

Tubulin-alpha IgG  
DAPI

2 h Nocodazole

10  $\mu\text{m}$

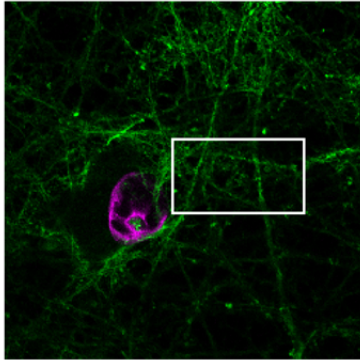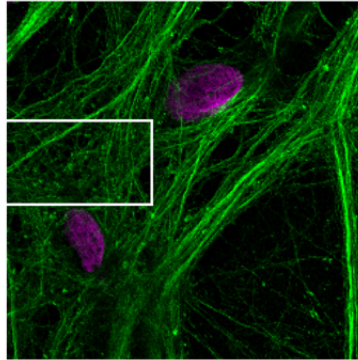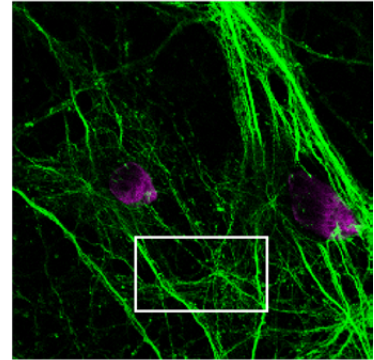

1  $\mu\text{m}$

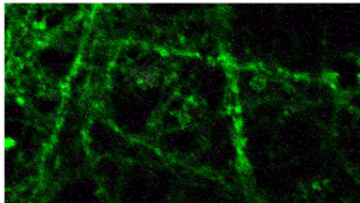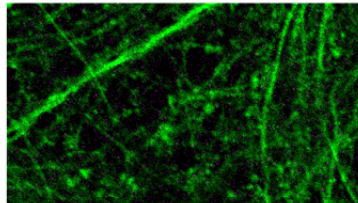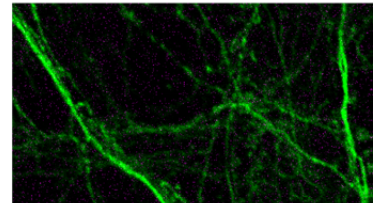

B

Tubulin-alpha IgG  
DAPI

2 h DMSO

10  $\mu\text{m}$

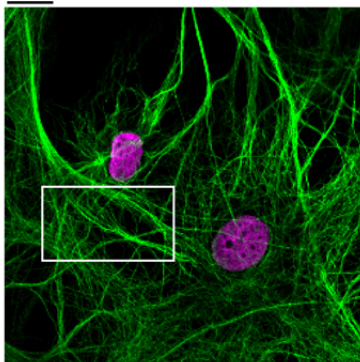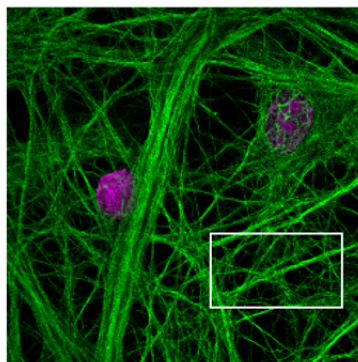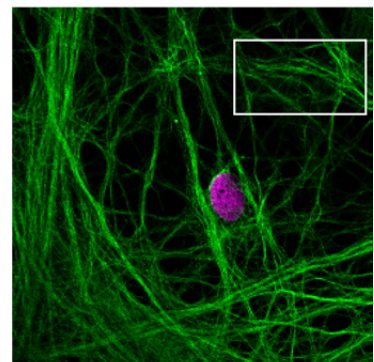

1  $\mu\text{m}$

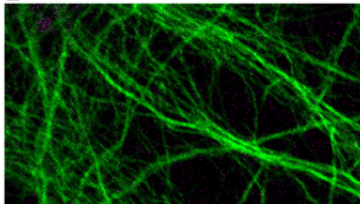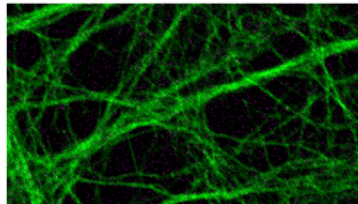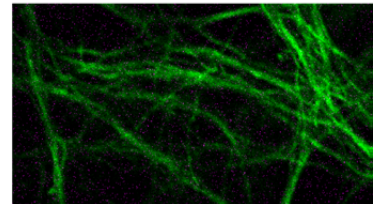

150

151

152



153 **Supplementary Figure 3. Immunostaining for microtubules after nocodazole treatment**

154 Cells were incubated for 2 h with either 10  $\mu$ M nocodazole (A) or 1/1000 DMSO (B) in the  
155 culture medium at 37 C before being immunolabeled with an antibody against  $\alpha$ -tubulin  
156 following the protocol described in Methods. Top row: exemplar full fields of view with confocal  
157 microscopy. Bottom row: insets corresponding to the white rectangles above. The contrast  
158 settings in the top row are consistent between conditions. They have been individually adjusted  
159 in bottom rows to facilitate the visualization of fine morphological details.

160



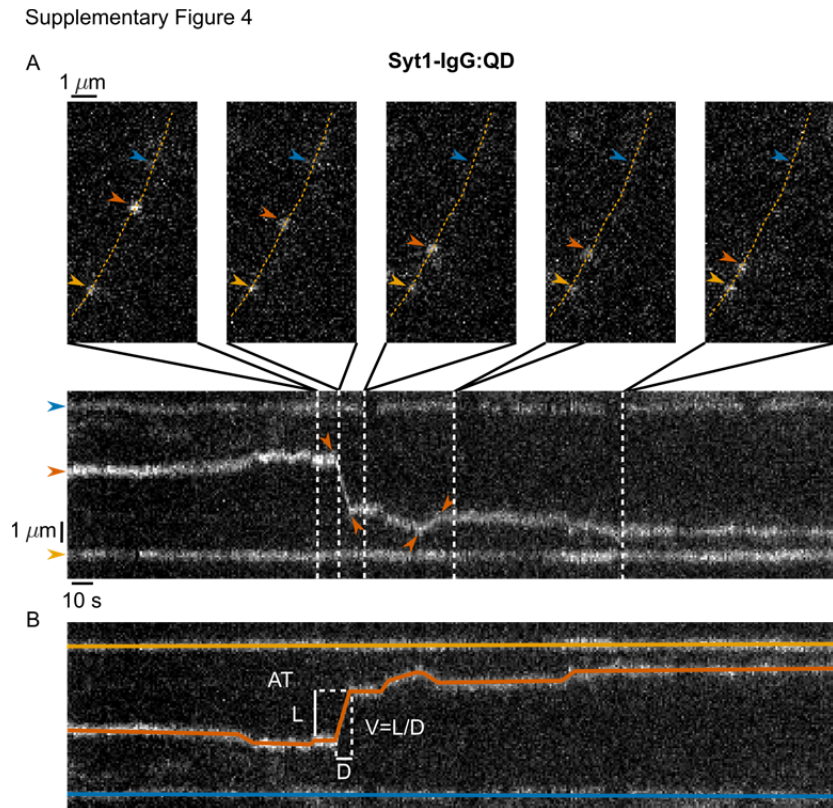

162

163 **Supplementary Figure 4. Methods for characterizing unitary events of SV active transport**  
 164 **along axons**

165 A: Microscopy views of a short axonal segment labeled with Syt1-IgG:QDs for different time  
 166 frames (top) and the corresponding kymograph representation (bottom). Three clusters of SVs  
 167 labeled by QDs are indicated by colored arrowheads. The extraction path (axon) is outlined by  
 168 the orange dotted curve. In the kymograph, red arrowheads indicate the starting and ending  
 169 points of two active transport (AT) events. The semi-automated trajectory segmentation  
 170 technique (Methods) yields the colored paths in (B). For one of the AT events we show the  
 171 corresponding length ( $L$ , vertical size), duration ( $D$ , horizontal size) and the computation of the  
 172 corresponding velocity ( $V$ ).

Supplementary Figure 5

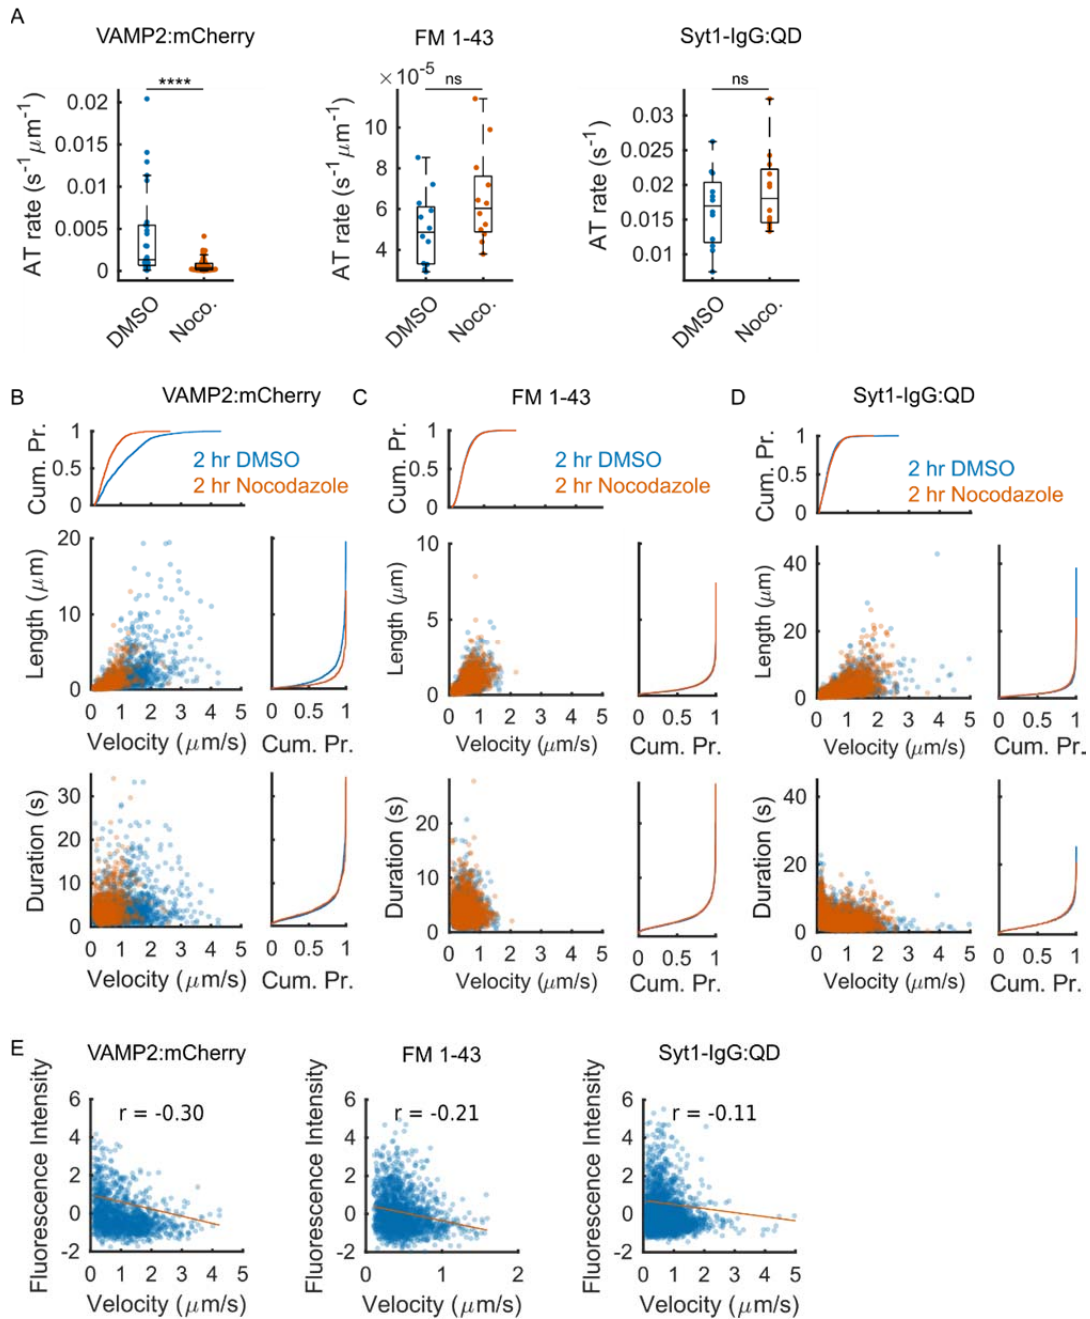

174

175 **Supplementary Figure 5. Nocodazole decreased the unitary velocity and the rate of AT of**  
 176 **VAMP2:mCherry cargos, but not of FM 1-43 and Syt1-IgG:QD**

177 Kymographs of axonal traffic were extracted and analyzed to identify and characterize individual  
 178 AT events after 2 h treatment with either 1/1000 DMSO or 10  $\mu M$  nocodazole (Noco.) for the  
 179 three fluorescent probes. Datasets for VAMP2:mCherry and Syt1-IgG:QD are the same as

180 main Fig. 1. A: The rate of AT events was diminished (median -74.5%) ( $p < 10^{-4}$ , RS test; DMSO:  
181  $N=12$  movies from 8 coverslips; Noco.:  $N=12$  movies from 4 coverslips) when VAMP2-mCherry  
182 was used. This was neither the case for SVs labeled with FM 1-43 (median +24.0%,  $p > 0.12$ ,  
183 rank-sum (RS) test; DMSO:  $N=12$  movies from 5 coverslips; Noco.:  $N=12$  movies from 3  
184 coverslips) and Syt1-IgG:QDs (median +6.4%,  $p > 0.40$ , RS test; DMSO:  $N=12$  movies from 8  
185 coverslips; Noco.:  $N=12$  movies from 7 coverslips). B-E: B: Nocodazole had a significant effect  
186 on the unitary properties of AT events of VAMP2 clusters ( $p < 10^{-6}$ , mANOVA including AT  
187 velocity, length and duration; DMSO:  $N=1468$  events; Noco.:  $N=856$  events). Velocity (median -  
188 44.5%,  $p < 10^{-6}$ , RS test) and length (median -42.8%,  $p < 10^{-6}$ , RS test) were the most affected  
189 (duration: median +9.3%,  $p < 5 \times 10^{-3}$ , RS test). C-D: Nocodazole had no effect on the unitary  
190 properties of AT events of FM 1-43 clusters ( $p=0.19$ , mANOVA including AT velocity, length and  
191 duration; DMSO:  $N=1824$ ; Noco.:  $N=2407$  events) and of Syt1-IgG:QD-labeled cargos ( $p=0.055$ ,  
192 mANOVA including AT velocity, length and duration; DMSO:  $N=2871$  events; Noco.:  $N=2862$   
193 events). E: Pearson correlation between the velocity of cargos actively transported and their  
194 fluorescence intensity, a proxy for their physical size. VAMP2-mCherry:  $r=-0.30$ , ( $p < 10^{-6}$ ,  
195  $N=1468$  events). FM 1-43:  $r=-0.21$  ( $p < 10^{-6}$ ,  $N=1824$  events events). Syt1-IgG:QD:  $r=-0.11$   
196 ( $p < 10^{-6}$ ,  $N=2871$  events events). Box plots: median, 25% and 75% percentiles (box) and  
197 extreme points (whiskers, excluding outliers).

Supplementary Figure 6

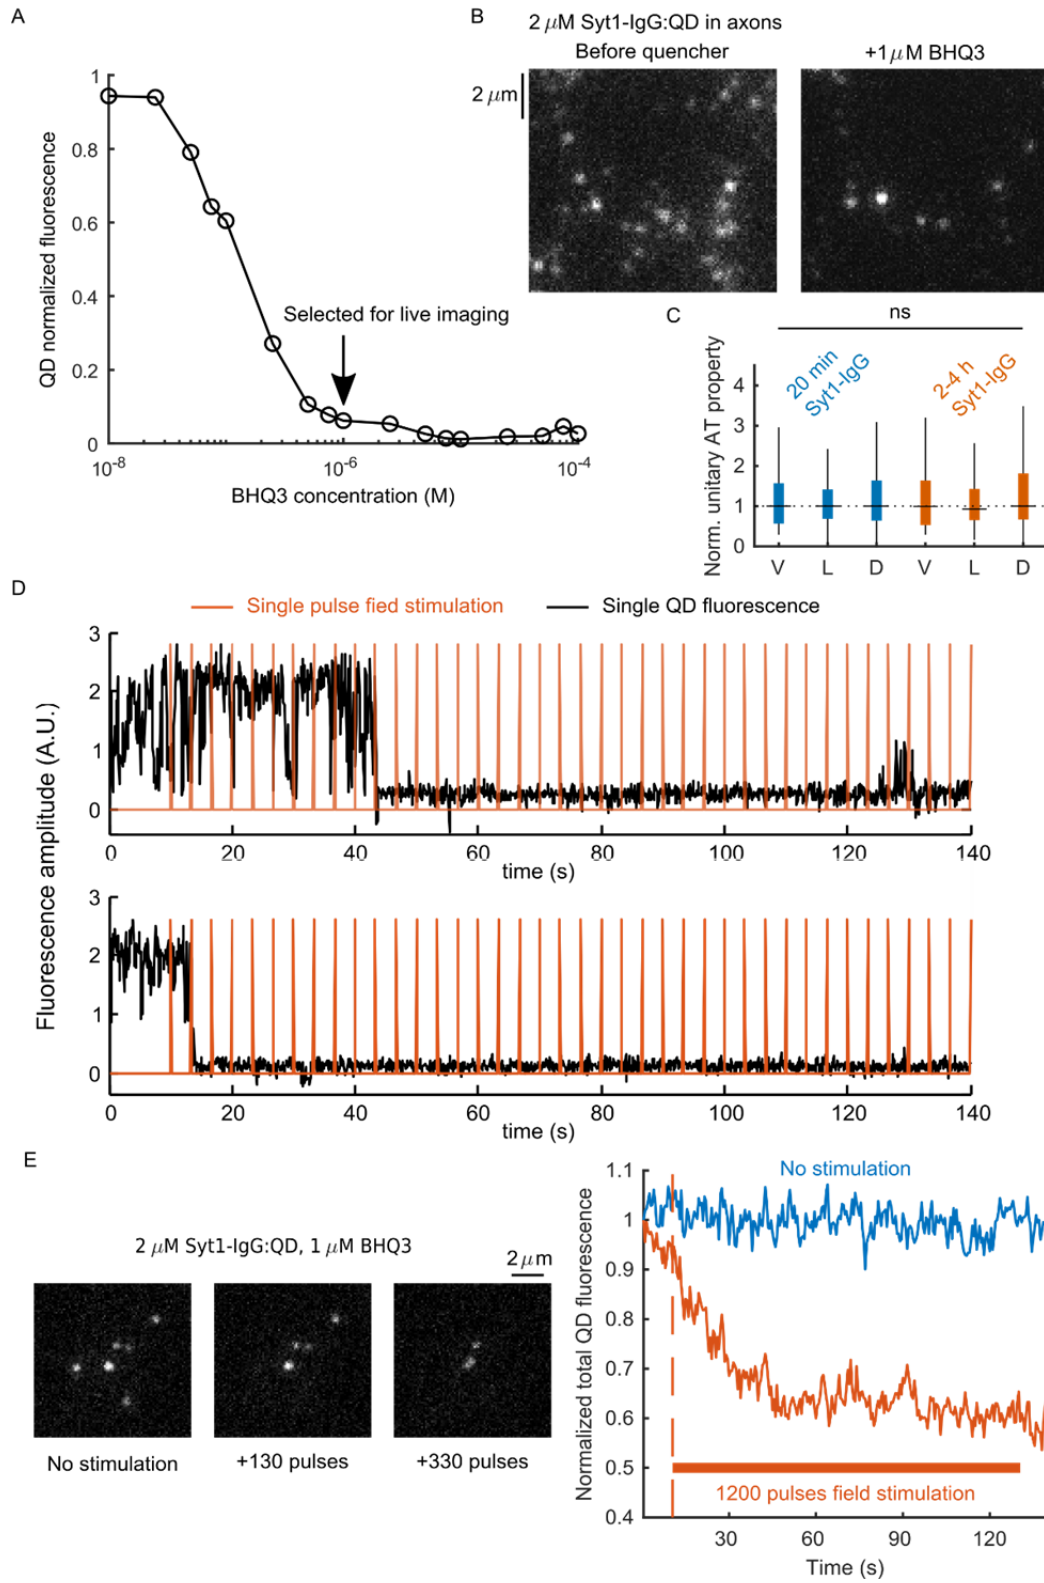

198

199

200 **Supplementary Figure 6. Syt1-IgG:QDs were exocytosed upon electrical stimulation and**  
201 **the fluorescence of external QDs quenched**

202 A: QD fluorescence quenching by BHQ3 was titrated in vitro by varying the concentration of  
203 BHQ3 in QD solutions in wells and using a fluorescence plate reader. B: In neurons, addition of  
204 1  $\mu$ M BHQ3 to the bath resulted in the disappearance of multiple QDs, confirming the potent  
205 quenching of the fluorescence of external QDs. C: The dynamics of SVs labeled with Syt1-  
206 IgG:QD with our standard protocol ('2-4 h Syt1-IgG', Methods) was compared to SVs  
207 exposed for a shorter time to high concentration of IgGs ('20 min Syt1-IgG'). The latter protocol  
208 consisted in 1/ bathing cells in a Tyrode's solution with 25 mM K<sup>+</sup> and containing synaptic AP5,  
209 NBQX, 4% BSA and the biotinylated anti-Syt1 antibody for only 20 min, 2/ washing the cells for  
210 10 min with an antibody-free 4 mM K<sup>+</sup> solution, 3/ applying a 45 mM K<sup>+</sup> solution containing  
211 streptavidin-coated QDs and BSA for 90 s, 4/ extensively washing with a QD- and IgG-free  
212 solution. mANOVA including AT velocity (V), length (L) and duration (D):  $p > 0.3$  ('20 min',  $N=284$   
213 events from 4 coverslips; '2-4 h',  $N=359$  events from 4 coverslips). D: When single electrical  
214 pulses were applied to cells by field stimulation, QD exocytosis appeared to be synchronized  
215 with the electrical stimulation. E: When a train of electrical stimuli (1200 stimuli, 10 Hz) was  
216 applied a significant number of QDs disappeared, hence confirming the fusion-competence of  
217 SVs labeled with Syt1-IgG:QDs. Fluorescence was stable in the absence of stimulation. We  
218 selected immobile puncta for the analysis (no stimulation  $N=133$ , stimulation  $N=127$ ).

Supplementary Figure 7

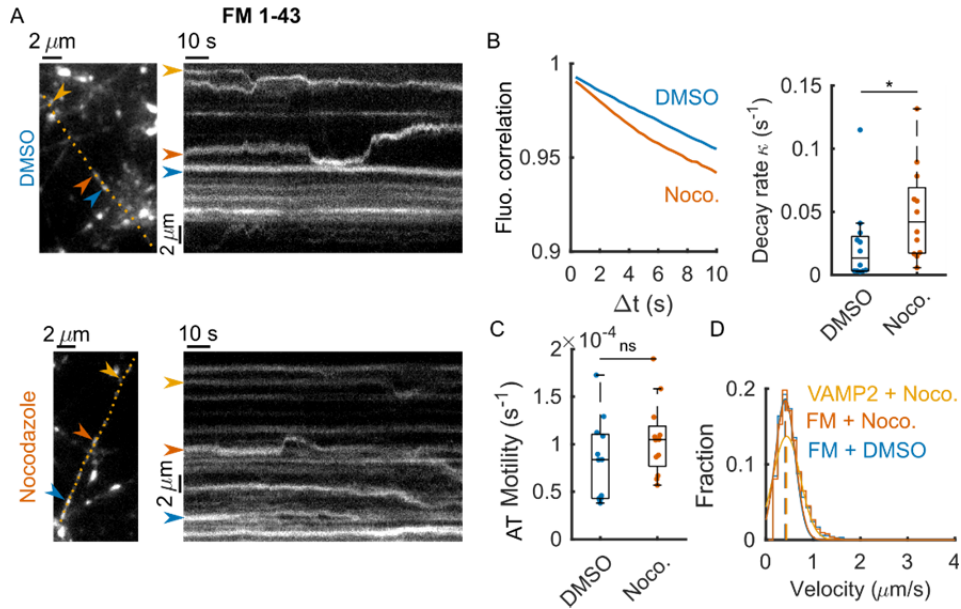

219

220 **Supplementary Figure 7. Microtubule disruption with nocodazole spared the transport of**  
 221 **FM-labeled clusters**

222 FM 1-43 was endocytosed by neuronal cells after a standard hyper stimulation (45 mM K<sup>+</sup>, 90s)  
 223 and imaged by time-lapse microscopy. A: Kymographs of FM-loaded SVs showed bright  
 224 stationary clusters of fluorescence, likely corresponding to presynaptic terminals (blue  
 225 arrowhead) along with mobile clusters that moved transiently (red and yellow arrowheads).  
 226 Cultures were preincubated for 2 h with either 10 μM nocodazole (bottom) or 1/1000 DMSO  
 227 (top). B: median autocorrelogram derived from kymographs (left) and corresponding individual  
 228 exponential decay rates (right). The median auto-correlation decay rates were 0.0133 s<sup>-1</sup>  
 229 (DMSO, N=12 movies) and 0.042 s<sup>-1</sup> (Noco., N=12 movies). *p*=0.04, RS test. C: the median AT-  
 230 based motility was 1.05×10<sup>-4</sup> (DMSO) and 0.84×10<sup>-4</sup> (Noco.). *p*>0.19, RS test. D: The unitary  
 231 velocity distributions were well-approximated by a single Gaussian function with mean  
 232 0.407±0.206 μm s<sup>-1</sup> (DMSO, N=1824 events) and 0.414±0.210 μm s<sup>-1</sup> (Noco., N=2407 events).  
 233 Box plots: median, 25% and 75% percentiles (box) and extreme points (whiskers, excluding  
 234 outliers). Data is from from 3 independent coverslips for the Noco. group and from 5 coverslips  
 235 for DMSO treatment.

236



Supplementary Figure 8

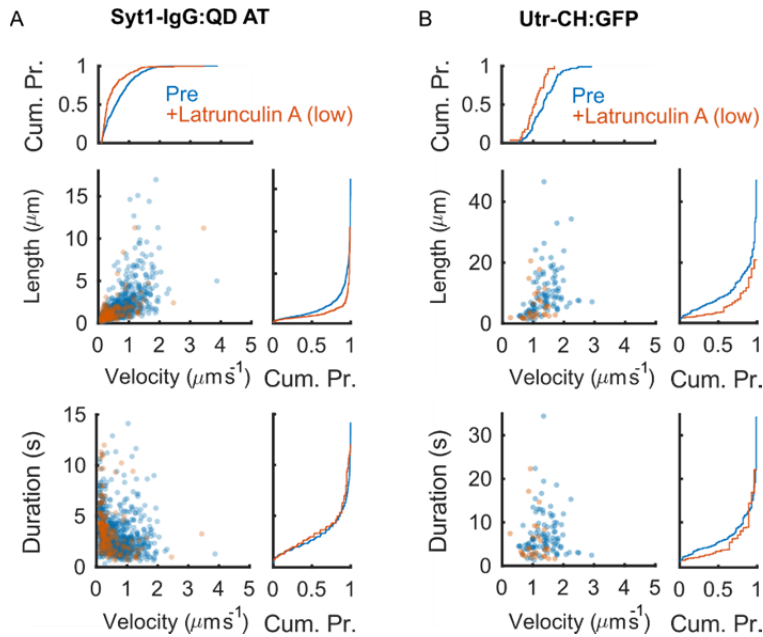

237

238 **Supplementary Figure 8. Latrunculin A mainly affected the velocity of spared unitary SV**  
 239 **AT events and actin filaments**

240 The effect of a low dose of latrunculin A (0.1  $\mu\text{M}$ , 3 min) (low) on the unitary properties of SV AT  
 241 events (A) and on the unitary properties of actin filaments as visualized by Utr-CH:GFP [13] (B)  
 242 were quantified. A paired experiment to minimize inter-coverslip variability was used. Raw data  
 243 used for analysis was the same as in Fig. 2. A-C  $p < 10^{-6}$ , mANOVA including AT velocity, length  
 244 and duration (pre,  $N=772$  events; latrunculin A,  $N=195$  events). Length:  $p < 10^{-6}$ , RS test.  
 245 Velocity:  $p < 10^{-6}$ , RS test. Duration:  $p > 0.10$ , RS test. B:  $p < 10^{-2}$ , mANOVA including AT velocity,  
 246 length and duration (pre  $N=100$  events; latrunculin A  $N=28$  events). Length:  $p < 10^{-3}$ , RS test.  
 247 Velocity:  $p = 2 \times 10^{-3}$ , RS test. Duration:  $p < 10^{-2}$ , RS.



Supplementary Figure 9

A

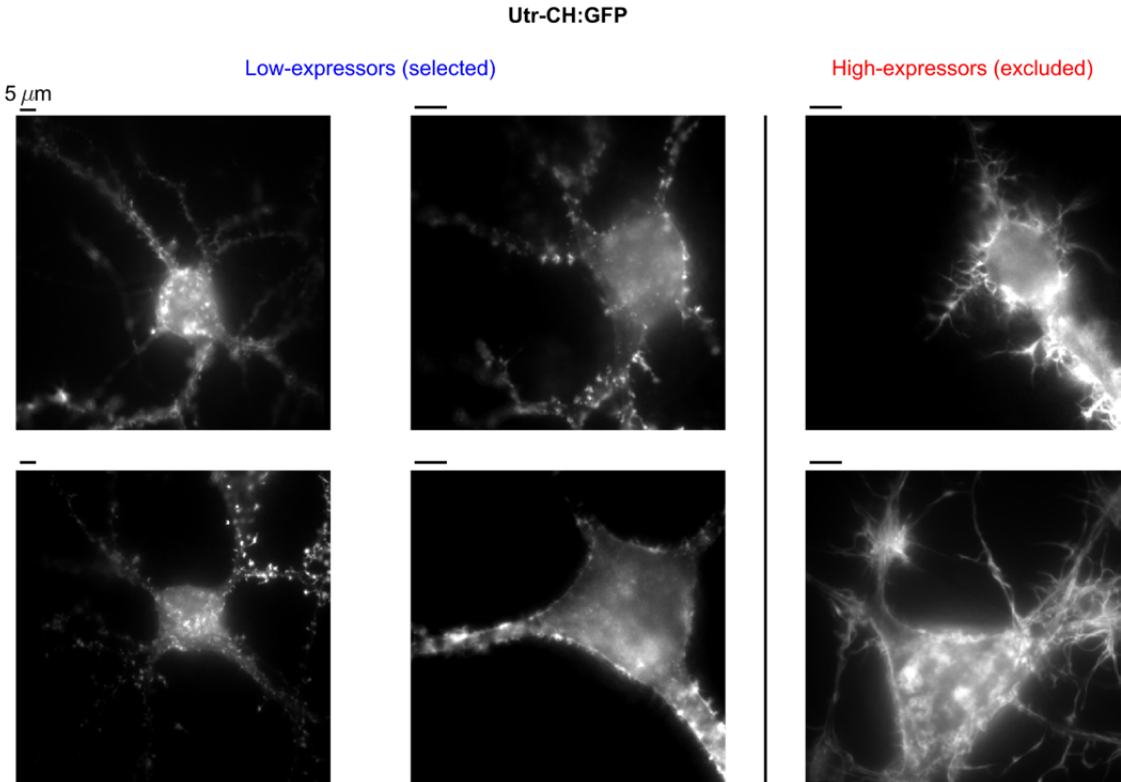

B

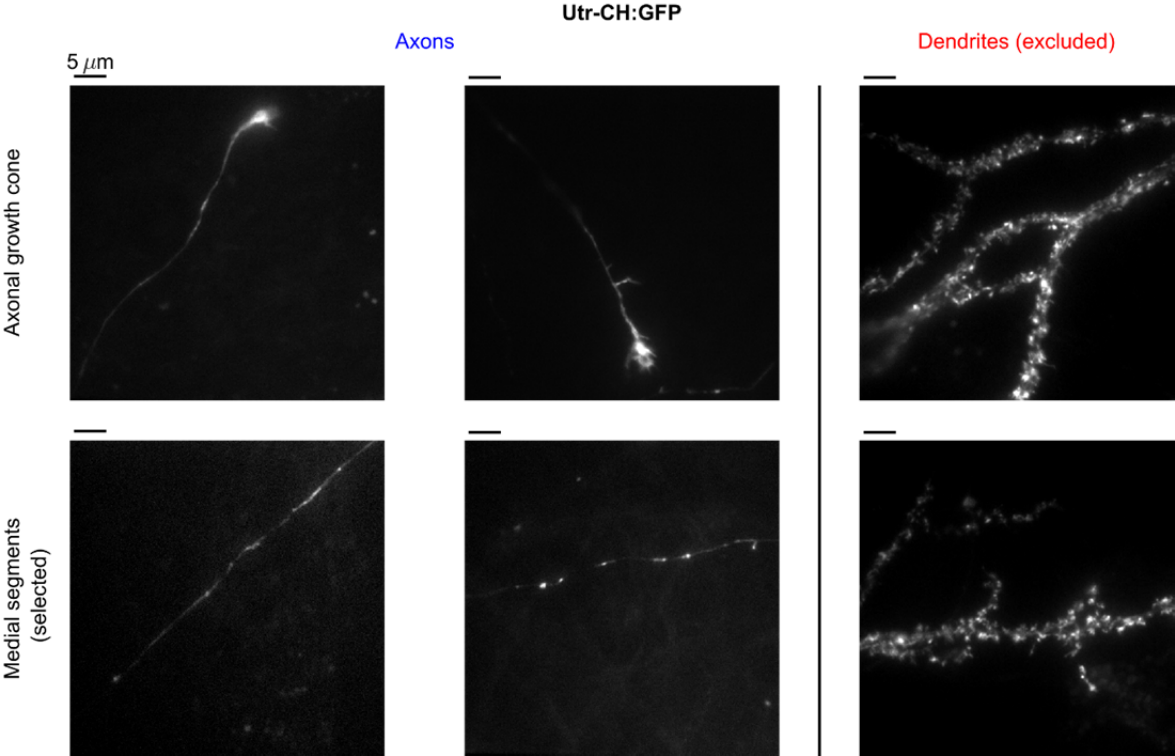

248

249

250 **Supplementary Figure 9. Selection of axons expressing Utr-CH:GFP as a F-actin probe**

251 As reported earlier, the level of Utr-CH:GFP expression in cultured hippocampal neurons can  
252 vary from one cell to another, with high amounts of Utr-CH:GFP impairing physiological actin  
253 dynamics [14]. Based on the level of fluorescence and the presence of morphological defects  
254 neurons were therefore systematically screened and segregated between high and low  
255 expressor cells (A) and only low expressors were selected for further experiments. B: axons  
256 were identified by finding stereotypical growth cones rich in actin (top left), and tracing back  
257 axons to their more medial part (bottom left). Medial parts assumed a smooth shape with bright  
258 clusters likely corresponding to synapses and axonal actin 'hotspots' [14]. Medial axonal  
259 segments could not be confused with dendrites which were thicker, branched, and contained  
260 bright spines sprouting out of the shaft (right). Image contrast was individually adjusted for clear  
261 visualization of fine morphological details.

262

Supplementary Figure 10

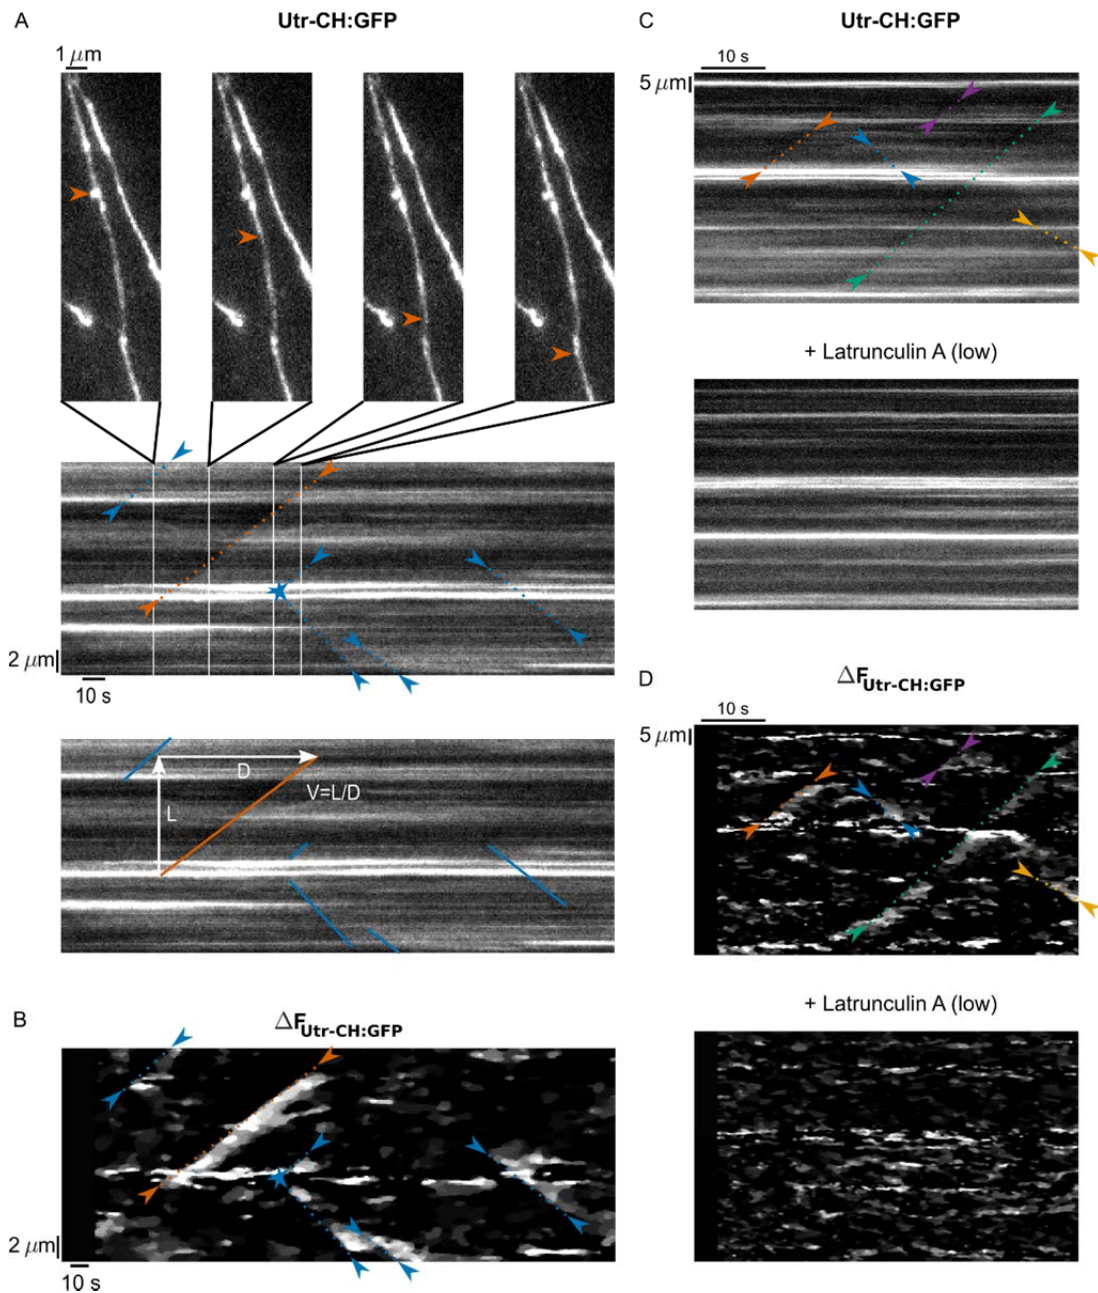

263

264 **Supplementary Figure 10. Quantification of longitudinal F-actin polymerization along**  
265 **axons and of the effect of latrunculin A (low)**

266 Longitudinal F-actin in axons was visualized by virtue of the expression of Utr-CH:GFP and the  
267 extraction of spatio-temporal kymographs, which enabled quantification of pharmacological  
268 effects. A: A filament tip (red arrow) was seen to emerge from an actin hotspot (top, left-most  
269 panel) and to quickly elongate along an axon (top-row panels). After kymograph extraction  
270 (middle panel), the filament was seen as a diagonal step of fluorescence increase (red line and

271 arrows). Multiple other polymerization events could be detected along the same axonal stretch  
272 (blue). Filament elongation length ( $L$ ) and duration ( $D$ ) were measured as the vertical and  
273 horizontal sizes of fluorescence steps and elongation velocity was computed as  $V = L/D$  (bottom  
274 panel). B:  $\Delta F_{\text{Utr-CH:GFP}}$ , a filtered image that enhances step-like features in images was used to  
275 check the presence of the polymerization events identified in (A).  $\Delta F_{\text{Utr-CH:GFP}}$  was computed as  
276 the smoothed, positive, difference between the UTR-CH:GFP fluorescence at the current time  
277 point minus the averaged signal from -6 s to -1 s prior (Methods). C: Exemplar UTR-CH:GFP  
278 signals before and after a treatment with a low dose (0.1  $\mu\text{M}$ , 3 min) of latrunculin A. Same  
279 images as in main manuscript Figure 2C. D:  $\Delta F_{\text{Utr-CH:GFP}}$  images corresponding to (C), showing  
280 the presence of F-actin polymerization events (diagonal edges, top panel) or their absence  
281 (bottom) prior to or after treatment with latrunculin A.

Supplementary Figure 11

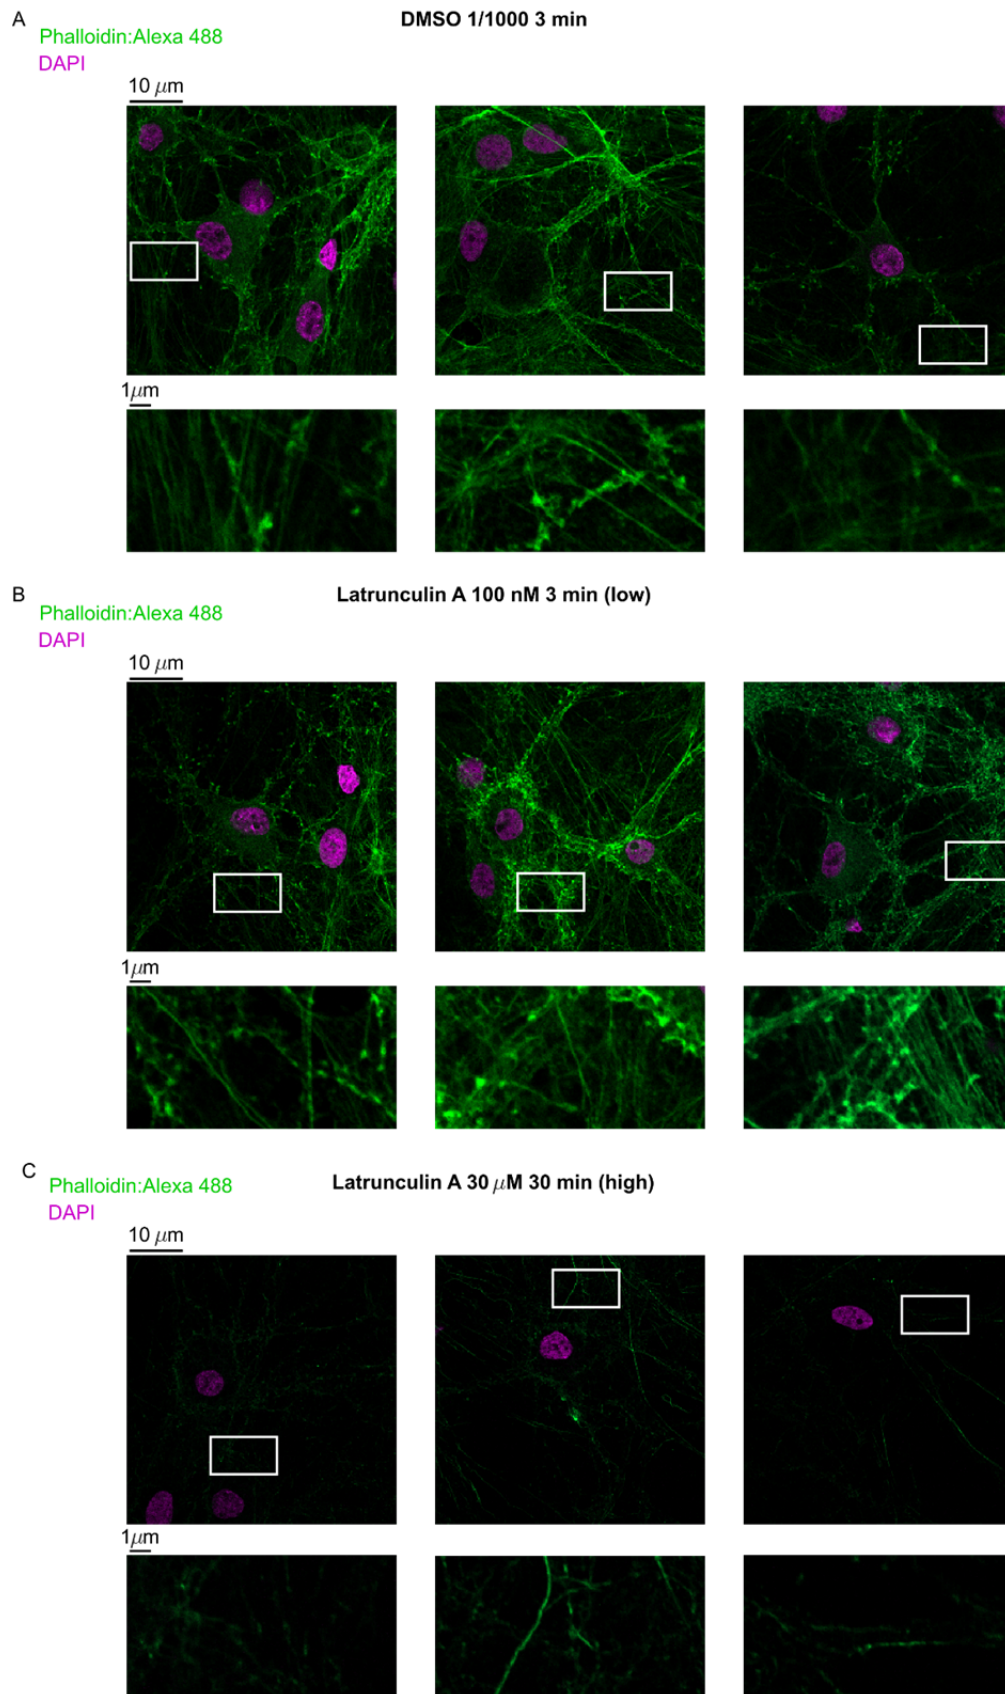



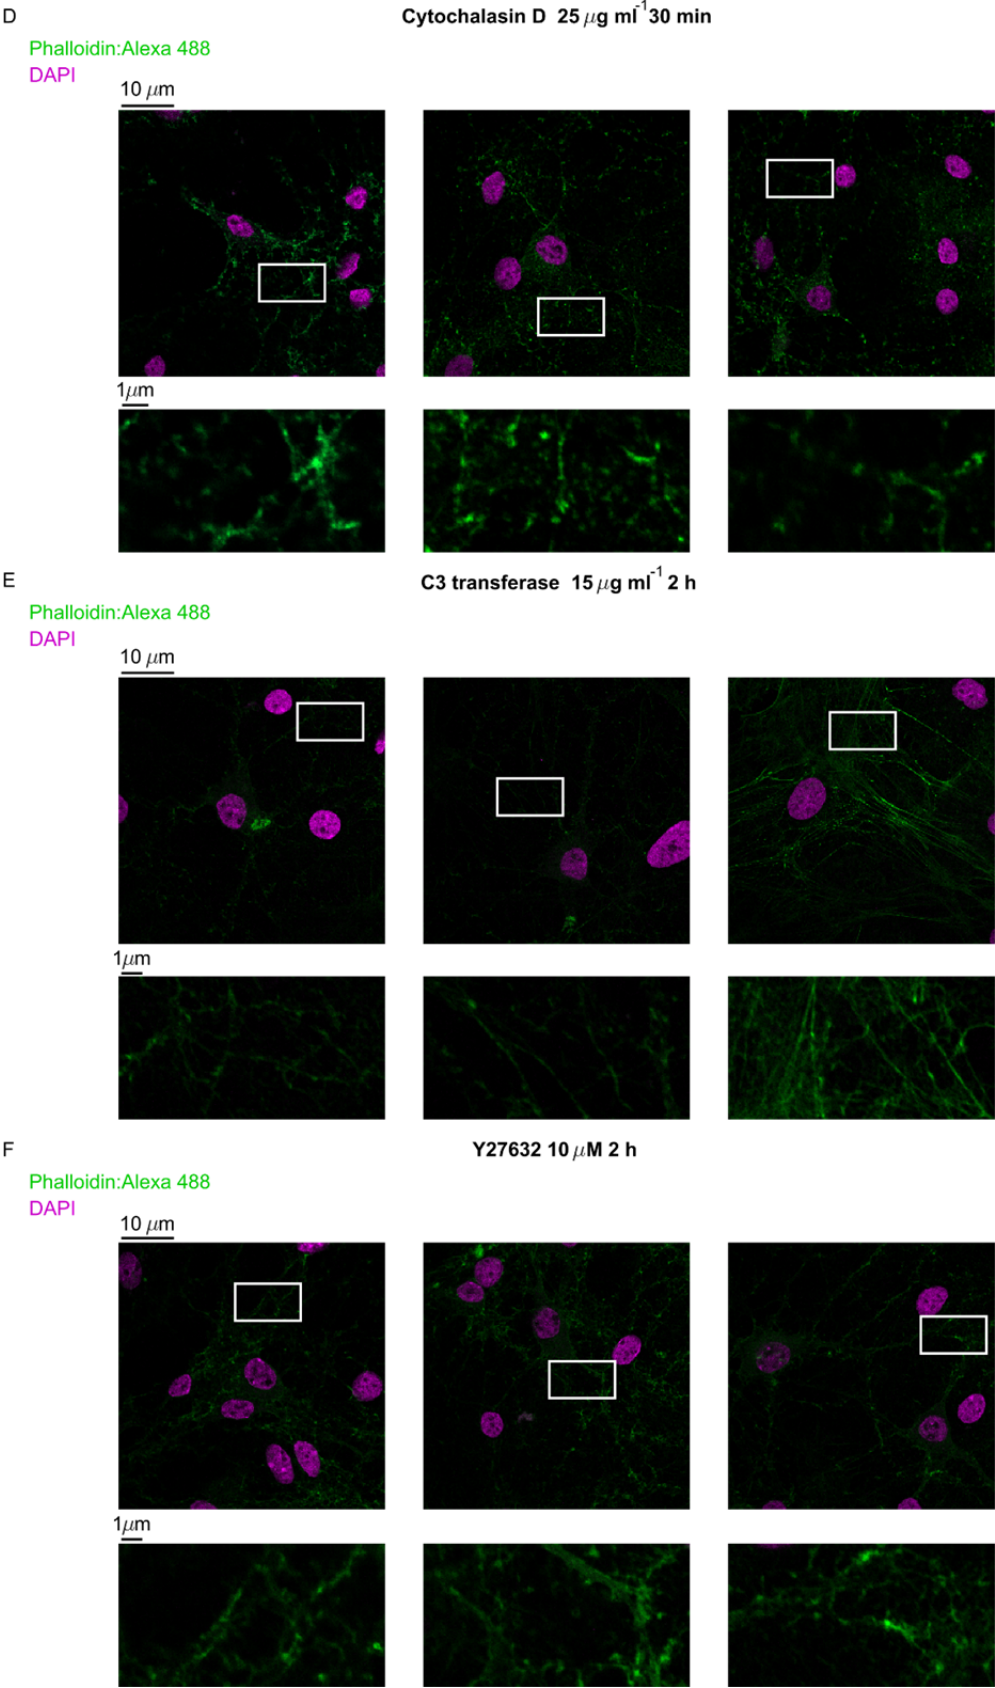

Supplementary Figure 11 (continued)

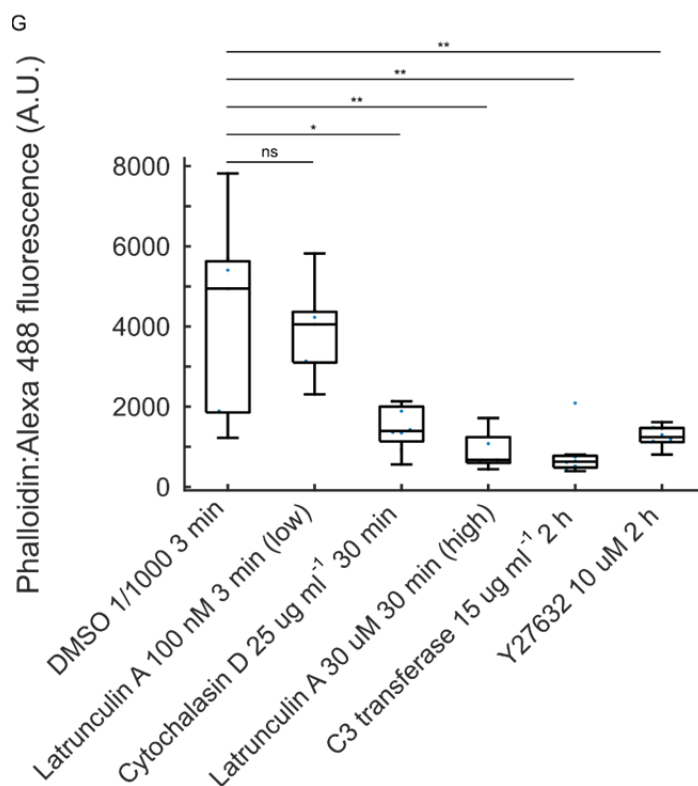

284

285 **Supplementary Figure 11. Labeling of F-actin after differential application of actin-**  
 286 **perturbing drugs**

287 F-actin was labeled using a Phalloidin:Alexa 488 probe after G-actin extraction and fixation  
 288 (Methods). Pharmacological protocols were similar to that of experiments in which SV-traffic and  
 289 dynamic actin polymerization were monitored (Fig. 2 and 6). A-F: Top rows: exemplar full fields  
 290 of view with confocal microscopy. Bottom rows: insets corresponding to the white rectangles  
 291 above. The contrast settings in the top row are consistent between conditions. They have been  
 292 individually adjusted in bottom rows to facilitate the visualization of fine morphological details. G:  
 293 Total fluorescence was measured for each pharmacological treatment as a readout of total F-  
 294 actin amount. Treatments were individually compared with the control condition (1/1000 DMSO,  
 295 3 min) ( $N=7$ ). Latrunculin A (low): median fluorescence -18.0% ( $p=1$ , RS test) ( $N=7$  images).  
 296 Latrunculin A (high): median fluorescence -86.4% ( $p=0.002$ , RS test) ( $N=7$  images).  
 297 Cytochalasin D: median fluorescence -71.8% ( $p=0.05$ , RS test) ( $N=8$  images). C3 transferase:  
 298 median fluorescence -87.3% ( $p=0.002$ , RS test) ( $N=8$ ). Y27632: median fluorescence -74.9%  
 299 ( $p=0.004$ , RS test) ( $N=8$  images). Box plots: median, 25% and 75% percentiles (box) and  
 300 extreme points (whiskers, excluding outliers).





Supplementary Figure 12

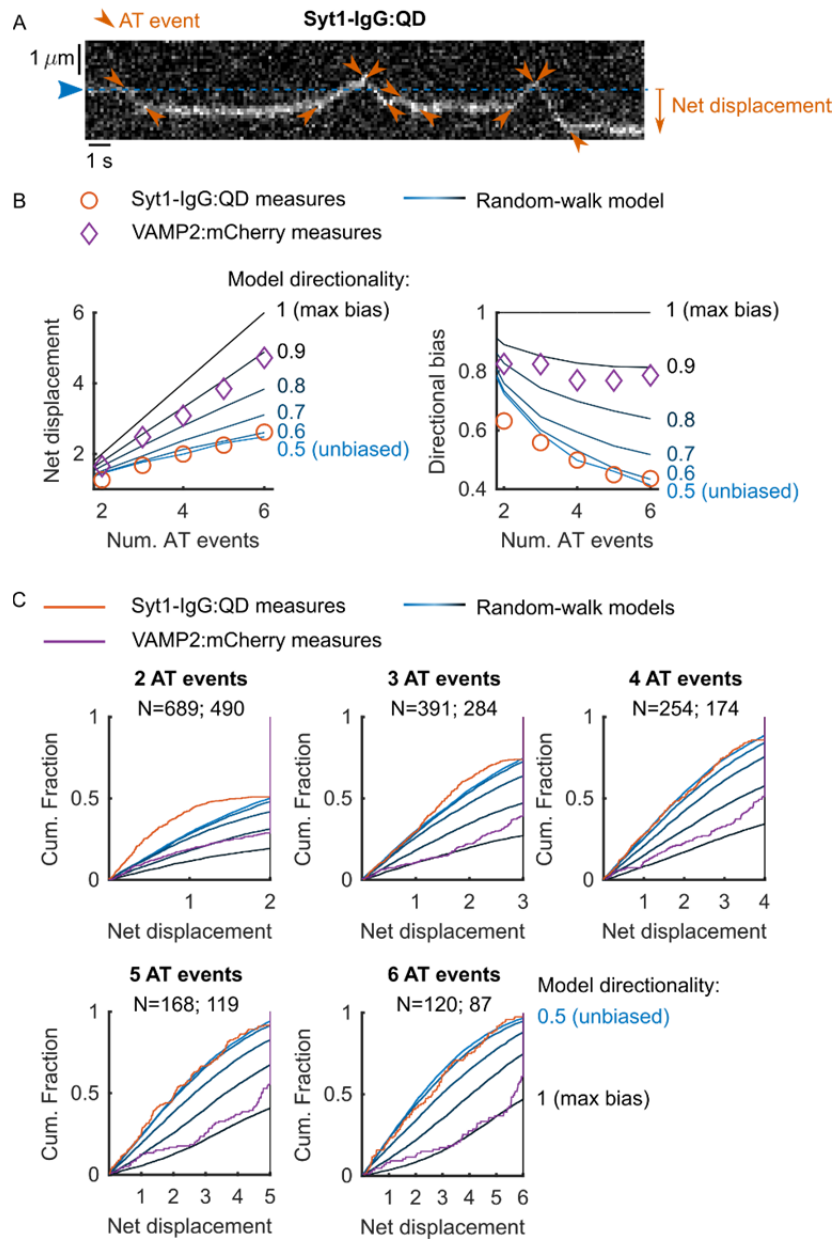

302

303 **Supplementary Figure 12. Sequences of Syt1-IgG:QD active transport events are not**  
 304 **directionally biased**

305 A: For 327 Syt1-IgG:QD clusters, we measured the net AT-based displacement as the distance  
 306 between the QD positions before and after a sequence of AT events. Net displacement  
 307 measures were then rescaled individually by normalizing each AT length by the average AT  
 308 distance. Therefore, after normalization, the maximum net distance for a sequence of  $k$  AT  
 309 events was  $k$ . B: Net displacement values for different numbers of events were compared (red  
 310 circles) to those obtained with unbiased random-walk models with different probabilities of

311 moving in the dominant direction ('model directionality', 1: fully directional, 0.5: unbiased)  
312 (simulated trajectory  $N=5000$  for each directionality setting) (left, average). AT distance values  
313 for the random walk model were randomly drawn in a centered normal distribution and  
314 renormalized for unit average norm. The anticipated maximal net displacement in case of a  
315 maximally directional sequence of AT events is a unit-slope line (black line). To better measure  
316 the evolution of the directional bias with an increasing number of AT events we also  
317 renormalized net displacement values by the maximal directional displacement (right). The  
318 directional bias for Syt1-IgG:QD measures ( $N=262$  SVs from 10 coverslips) did not appear to  
319 increase with the number of AT events and was indistinguishable from the unbiased random-  
320 walk model, in particular for long sequences of AT events which could more robustly highlight a  
321 possible directional bias. By contrast, the analysis of the AT of and 305 VAMP2:mCherry  
322 clusters (from 5 coverslips) provided evidence for strongly biased ( $\sim 0.9$ ) traffic (purple  
323 diamonds). C: The distributions of experimental net displacement measures were not  
324 significantly different from those of the unbiased random-walk for Syt1-IgG-containing clusters  
325 (6 AT events:  $p>0.34$ , RS test), but were for VAMP2:mCherry cargos (6 AT events:  $p<10^{-6}$ , RS  
326 test).

327

Supplementary Figure 13

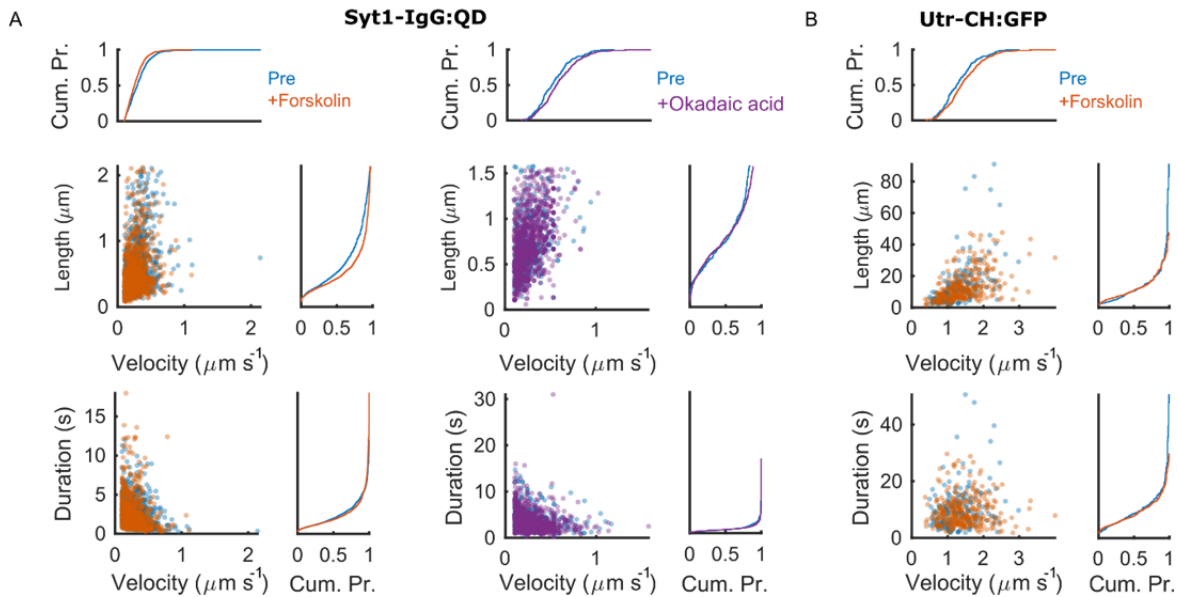

329

330 **Supplementary Figure 13. Unitary SV AT events and dynamic actin filaments were**  
 331 **insensitive to PKA activation**

332 A: In paired imaging experiments, SV traffic was monitored using Syt1-IgG:QDs and the  
 333 properties of AT transport events were measured before and after treatment with either forskolin  
 334 ( $10 \mu\text{M}$ , 10 min) to activate protein kinase A (PKA) (pre,  $N=681$  events, post,  $N=1025$  events  
 335 from 6 coverslips) or okadaic acid to inhibit protein phosphatase 1 and 2a (pre,  $N=421$  events,  
 336 post,  $N=1074$  events from 5 coverslips). Unitary events were compared before/after treatment  
 337 using a mANOVA including unitary velocity, length and duration of AT events and RS tests for  
 338 post hoc analysis. Forskolin: mANOVA  $p < 10^{-6}$ , median velocity -13.9% ( $p < 10^{-6}$ ), median length -  
 339 18.1% ( $p < 10^{-6}$ ), median duration -8.2% ( $p > 0.07$ ). Okadaic acid: mANOVA  $p = 0.48$ . B: the same  
 340 protocol for PKA activation and data analysis was used when actin polymerization was  
 341 quantified using the probe Utr-CH:GFP. mANOVA  $p > 0.05$  (pre,  $N=180$  filaments; post,  $N=327$   
 342 filaments from 6 coverslips). Raw data was the same as for main Fig. 5.

Supplementary Figure 14

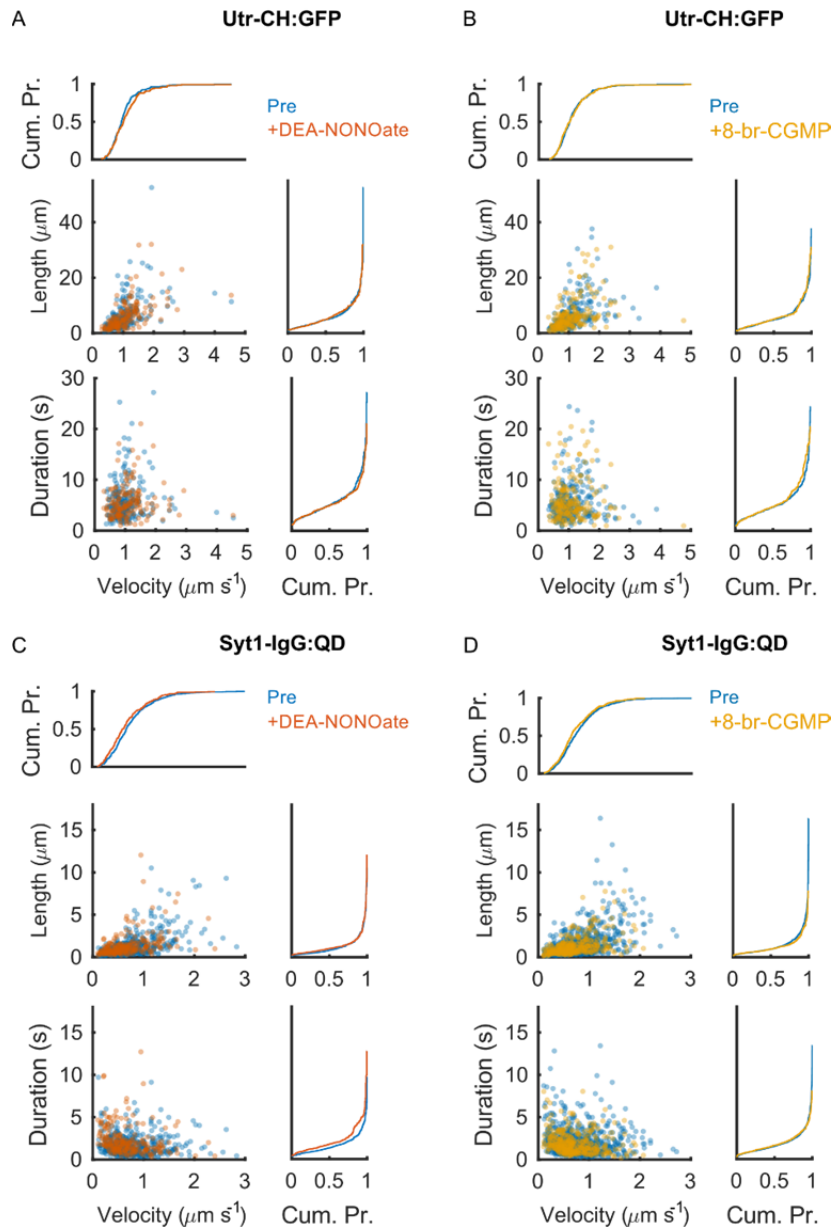

343

344 **Supplementary Figure 14. Effect of NO on of unitary AT events and unitary growing actin**  
345 **filaments**

346 Unitary properties of actin filaments and SV AT events were measured in paired imaging  
347 experiments before and after treatment with DEA-NONOate (3  $\mu\text{M}$ , 4 min), a fast nitric oxide  
348 (NO) donor (same raw data as in Fig. 6). Similarly, cGMP concentration was elevated by  
349 application of 8-br-cGMP (50  $\mu\text{M}$ , 4 min) to parallel the NO-induced increase in cyclic GMP. A-  
350 B: Unitary properties of fast-growing actin filaments as measured in Utr-CH:GFP-expressing

351 cells before/after treatments. DEA-NONOate: median velocity +1.7% ( $p>0.82$ , RS test), median  
352 length -3.7% ( $p>0.45$ , RS test), median duration +8.1% ( $p>0.1$ , RS test) (pre,  $N=226$  events  
353 from 8 coverslips; post,  $N=151$  events). 8-br-cGMP: median velocity +7.0% ( $p>0.12$ , RS test),  
354 median length +15.8% ( $p>0.06$ , RS test), median duration +5.5% ( $p>0.20$ , RS test) (pre,  $N=267$   
355 events from 7 coverslips; post,  $N=192$  events). C-D: SV AT measures before/after treatments.  
356 mANOVA for unitary events including velocity, length and duration for the DEA-NONOate  
357 treatment:  $p<10^{-6}$  (pre,  $N=543$  events from 5 coverslips; post,  $N=216$  events). Velocity median -  
358 11.0% ( $p<0.02$ , RS test), length median +24.0% ( $p<0.005$ , RS test), duration median +32.0%  
359 ( $p<10^{-6}$ , RS test). Same analysis for 8-br-cGMP: mANOVA  $p=0.084$  (pre,  $N=853$  from 4  
360 coverslips; post,  $N=329$ ).

361

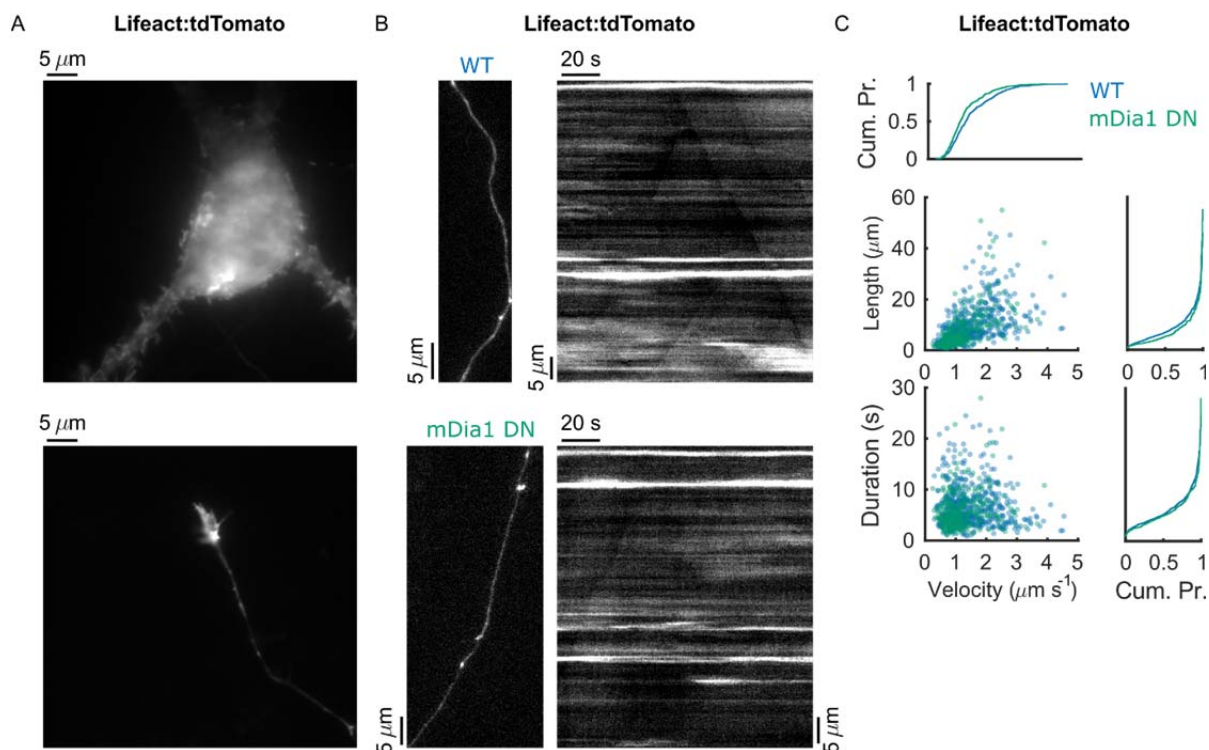

362

363 **Supplementary Figure 15. Genetic inhibition of mDia1 function impaired the dynamics of**  
 364 **actin filaments along axons**

365 A: Somatic (top) and axonal growth cone expression of the genetic probe Lifeact:tdTomato for  
 366 dynamic F-actin imaging. B: axonal expression of Lifeact:tdTomato (left) and the corresponding  
 367 fluorescence kymograph for 2 min of 5 Hz time-lapse imaging. Top: fluorescence time-course  
 368 when Lifeact:tdTomato is expressed alone (WT). Bottom: co-expression with a dominant  
 369 negative mDia1 construct (mDia1 DN). C: Unitary properties of fast actin filament polymerization  
 370 measured in WT and mDia1 DN cells. mANOVA WT vs mDia1 DN including length, velocity and  
 371 duration of filaments:  $p < 10^{-4}$ . Individual properties were moderately changed: velocity median -  
 372 15.0% ( $p < 10^{-4}$ , RS test), length median -23.0% ( $p < 10^{-4}$ , RS test), duration median -4.0%  
 373 ( $p > 0.05$ , RS test) (WT  $N=587$ , mDia1 DN  $N=272$ ). Data was from the same coverslips (6 for  
 374 WT, 8 for mDia1 DN) analyzed in Fig. 7F.

375



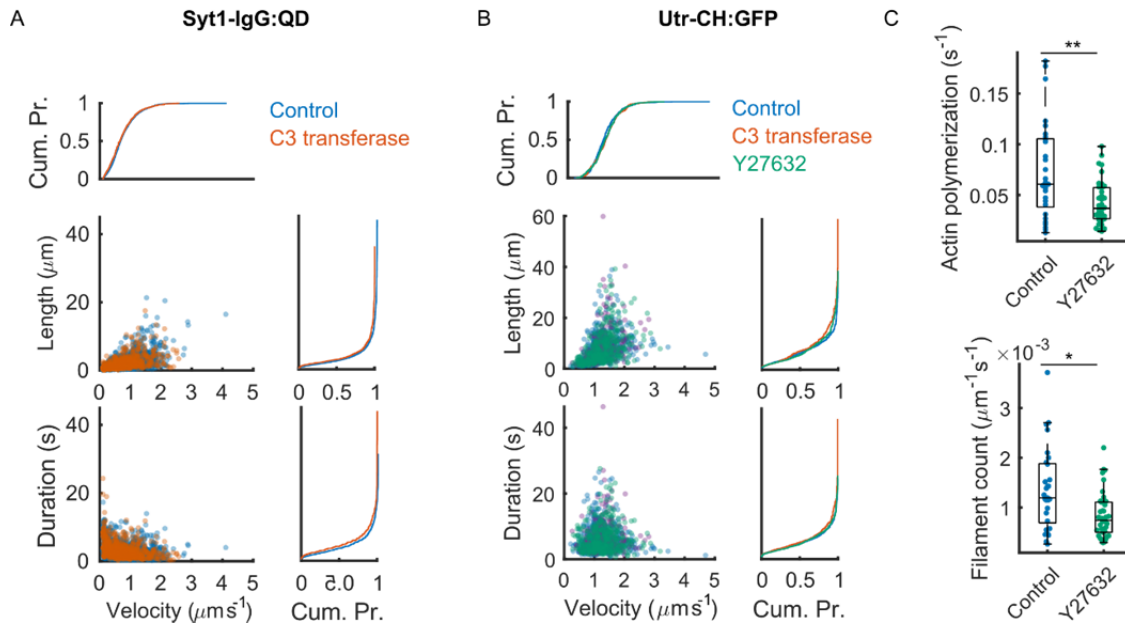

376

377 **Supplementary Figure 16. Multivariate statistical analysis of unitary AT events and actin**  
 378 **filaments after inhibition of RhoA and ROCK**

379 A: Cells were treated with the C3 transferase exoenzyme (2 h, 15  $\mu\text{g ml}^{-1}$ ) ( $N=29$  movies from 2  
 380 coverslips) to inhibit RhoA before being stained with Syt1-IgG:QDs (same raw data as Fig. 6).  
 381 Unitary SV AT events were then compared to ones observed in untreated coverslips ( $N=29$   
 382 movies from 3 coverslips). mANOVA with AT unitary length, velocity and duration:  $p < 10^{-6}$ .  
 383 Median velocity -2.78% ( $p=0.02$ , RS test), median length +14.9% ( $p < 10^{-6}$ , RS test), median  
 384 duration +16.7% ( $p < 10^{-6}$ , RS test) (DMSO,  $N=1898$  events; C3,  $N=931$  events). B: a similar  
 385 pharmacological strategy was used when neurons expressed Utr-CH:GFP to characterize the  
 386 effect of RhoA inhibition on unitary dynamic actin filaments (red). Inhibition of ROCK, a RhoA  
 387 effector, with Y27632 (2 h, 10  $\mu\text{M}$ ) was also investigated (green). 3 groups mANOVA: 1D  $p=$   
 388 0.002, 2D  $p=0.24$ , indicating that the means of the three groups are contained in a space of a  
 389 single dimension (DMSO,  $N=530$  filaments from 3 coverslips; C3,  $N=209$  filaments from 3  
 390 coverslips; Y27632,  $N=404$  filaments from 4 coverslips). Accordingly, we found: control vs C3  
 391 mANOVA:  $p < 10^{-3}$  and Y27632 vs C3 mANOVA: 1D  $p=0.23$ . Overall, it indicated that the  
 392 treatment with C3 transferase exoenzyme had a significant effect on unitary filament properties  
 393 when compared to controls, but that it was indistinguishable from that of Y27632. However, the  
 394 effect of the C3 treatment was non-significant when unitary properties were taken separately:  
 395 median velocity +7.0% ( $p > 0.11$ , RS test), median length +12.4% ( $p > 0.13$ , RS test), median

396 duration +3.3% ( $p>0.23$ , RS test). Little changes were also found for the Y27632 treatment:  
397 median velocity +5.1% ( $p>0.11$ , RS test), median length -11.8% ( $p>0.60$ , RS test), median  
398 duration -7.9% ( $p>0.43$ , RS test). C: Y27632 treatment yielded a large reduction of both the  
399 total actin polymerization: median -39.2% ( $p<0.01$ , RS test) and the frequency of occurrence of  
400 new filament polymerization: median -38.0% ( $p<0.02$ , RS test) (control,  $N=29$  movies from 3  
401 coverslips; Y27632,  $N=38$  from 4 coverslips). Box plots: median, 25% and 75% percentiles  
402 (box) and extreme points (whiskers, excluding outliers).

Supplementary Figure 17

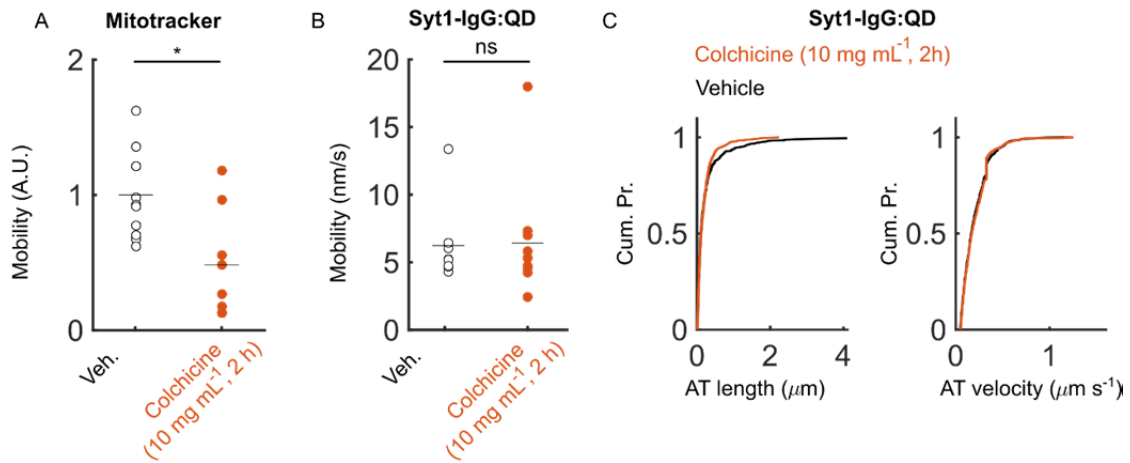

403

404 **Supplementary Figure 17. Synaptic vesicle traffic is spared by microtubule disruption**  
405 **with colchicine**

406 A: In neurons, colchicine inhibited the traffic of neuronal mitochondria when we measured their  
407 total mobility (normalized distance traveled by directed motion). RS test:  $p < 0.01$  (vehicle,  $N = 11$   
408 movies; colchicine,  $N = 8$  movies). B: the mobility of SVs labeled with Syt1-IgG:QDs was spared  
409 by colchicine. RS test:  $p > 0.8$  (veh.  $N = 8$  movies; colchicine  $N = 10$  movies). C: Unitary properties  
410 of Syt1-IgG:QDs active transport (AT) were compared. AT length:  $p > 0.1$ , RS test. AT velocity:  
411  $p > 0.5$ , RS test (veh.,  $N = 721$  events; colchicine,  $N = 813$  events).

412

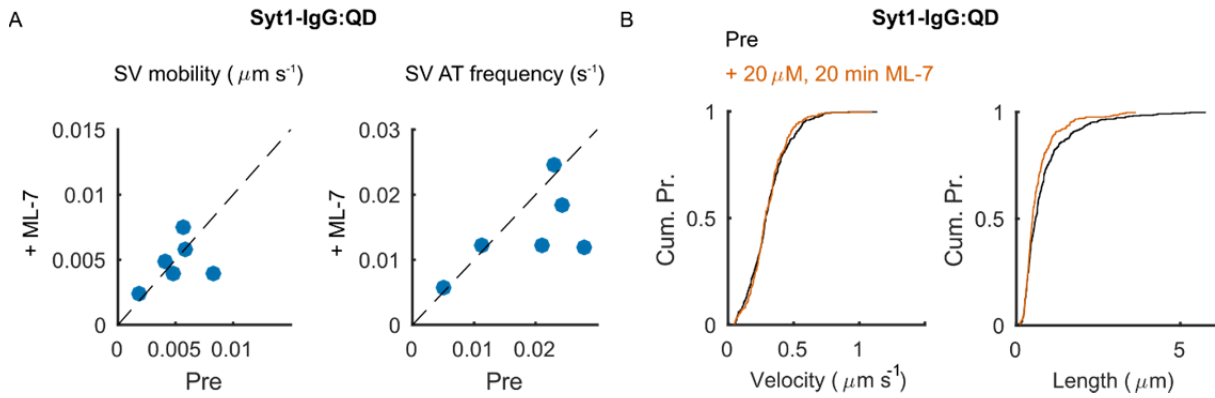

413

414 **Supplementary Figure 18. SV traffic under myosin light chain kinase inhibition with ML-7**

415 The traffic of SVs labeled with Syt1-IgG:QD was quantified in a paired experiment before and  
 416 after treatment with 20  $\mu\text{M}$  ML-7 for 15 min. (A) median mobility change was +7.0% ( $p=1$ , two-  
 417 sided sign-test) and median AT frequency change was -9.0% ( $p=1$ , two-sided sign-test) ( $N=6$   
 418 coverslips). B: Unitary AT velocity was unchanged (median -0.007%,  $p>0.87\%$ , RS test) while  
 419 AT length saw a modest change (median -15%,  $p<0.01$ , RS test) (pre,  $N=447$  events; post,  
 420  $N=330$  events).

421

## Supplementary references

- 423 1. Buisson, J., et al., *Intraflagellar transport proteins cycle between the flagellum and its base*. J Cell  
424 Sci, 2013. **126**(Pt 1): p. 327-38.
- 425 2. de Chaumont, F., et al., *Icy: an open bioimage informatics platform for extended reproducible*  
426 *research*. Nat Methods, 2012. **9**(7): p. 690-6.
- 427 3. Beck, A. and M. Teboulle, *Fast gradient-based algorithms for constrained total variation image*  
428 *denoising and deblurring problems*. IEEE Trans Image Process, 2009. **18**(11): p. 2419-34.
- 429 4. Olivo-Marin, J.-C., *Extraction of spots in biological images using multiscale products*. Pattern  
430 Recognition. Vol. 35. 2002.
- 431 5. Chenouard, N., I. Bloch, and J.C. Olivo-Marin, *Multiple hypothesis tracking for cluttered*  
432 *biological image sequences*. IEEE Trans Pattern Anal Mach Intell, 2013. **35**(11): p. 2736-3750.
- 433 6. Chenouard, N. and R.W. Tsien. *An algorithm for piecewise-constant velocity estimation and*  
434 *application to particle trajectories in microscopy*. in *2015 IEEE 12th International Symposium on*  
435 *Biomedical Imaging (ISBI)*. 2015.
- 436 7. Saxton, M.J. and K. Jacobson, *Single-particle tracking: applications to membrane dynamics*. Annu  
437 Rev Biophys Biomol Struct, 1997. **26**: p. 373-99.
- 438 8. Henkel, A.W., et al., *Synaptic vesicle movements monitored by fluorescence recovery after*  
439 *photobleaching in nerve terminals stained with FM1-43*. J Neurosci, 1996. **16**(12): p. 3960-7.
- 440 9. Harata, N., et al., *Visualizing recycling synaptic vesicles in hippocampal neurons by FM 1-43*  
441 *photoconversion*. Proc Natl Acad Sci U S A, 2001. **98**(22): p. 12748-53.
- 442 10. Darcy, K.J., et al., *Constitutive sharing of recycling synaptic vesicles between presynaptic*  
443 *boutons*. Nat Neurosci, 2006. **9**(3): p. 315-21.
- 444 11. Staras, K., et al., *A vesicle superpool spans multiple presynaptic terminals in hippocampal*  
445 *neurons*. Neuron, 2010. **66**(1): p. 37-44.
- 446 12. Joensuu, M., et al., *Subdiffractional tracking of internalized molecules reveals heterogeneous*  
447 *motion states of synaptic vesicles*. J Cell Biol, 2016. **215**(2): p. 277-292.
- 448 13. Burkel, B.M., G. von Dassow, and W.M. Bement, *Versatile fluorescent probes for actin filaments*  
449 *based on the actin-binding domain of utrophin*. Cell Motil Cytoskeleton, 2007. **64**(11): p. 822-32.
- 450 14. Ganguly, A., et al., *A dynamic formin-dependent deep F-actin network in axons*. J Cell Biol, 2015.  
451 **210**(3): p. 401-17.
